# Supplementary material
Source: HighWire-hosted journal article supplement (https://dmd.aspetjournals.org/highwire/filestream/74839/field_highwire_adjunct_files/0/89565_Supplemental_data.pdf)
Supplement: 89565_Supplemental_data.pdf [file 89565_Supplemental_data.pdf]

## **Supplemental Data for**

### **Theophylline acetaldehyde as the initial product in doxophylline metabolism in human liver**

Xiaohua Zhao<sup>1,2</sup>, Hong Ma<sup>3,4</sup>, Qiusha Pan<sup>1,2</sup>, Haiyi Wang<sup>1,2</sup>, Xingkai Qian<sup>1,2</sup>, Peifang Song<sup>1,2</sup>, Liwei Zou<sup>1,2</sup>, Mingqing Mao<sup>5</sup>, Shuyue Xia<sup>5</sup>, Guangbo Ge<sup>1,2</sup>, Ling Yang<sup>1,2\*</sup>

<sup>1</sup>Institute of Interdisciplinary Integrative Medicine Research, Shanghai University of Traditional Chinese Medicine, Shanghai 201203, China

<sup>2</sup>Center for Systems Pharmacokinetics, Shanghai University of Traditional Chinese Medicine, Shanghai 201203, China

<sup>3</sup>College of Basic Medical Sciences, Dalian Medical University, Liaoning 116044, China

<sup>4</sup>Shanghai Research Institute of Acupuncture and Meridian, Shanghai 200030, China

<sup>5</sup>Respiratory Medicine Department, Central Hospital Affiliated to Shenyang Medical College, Liaoning 110034, China

---

**Supplemental Figure**

A

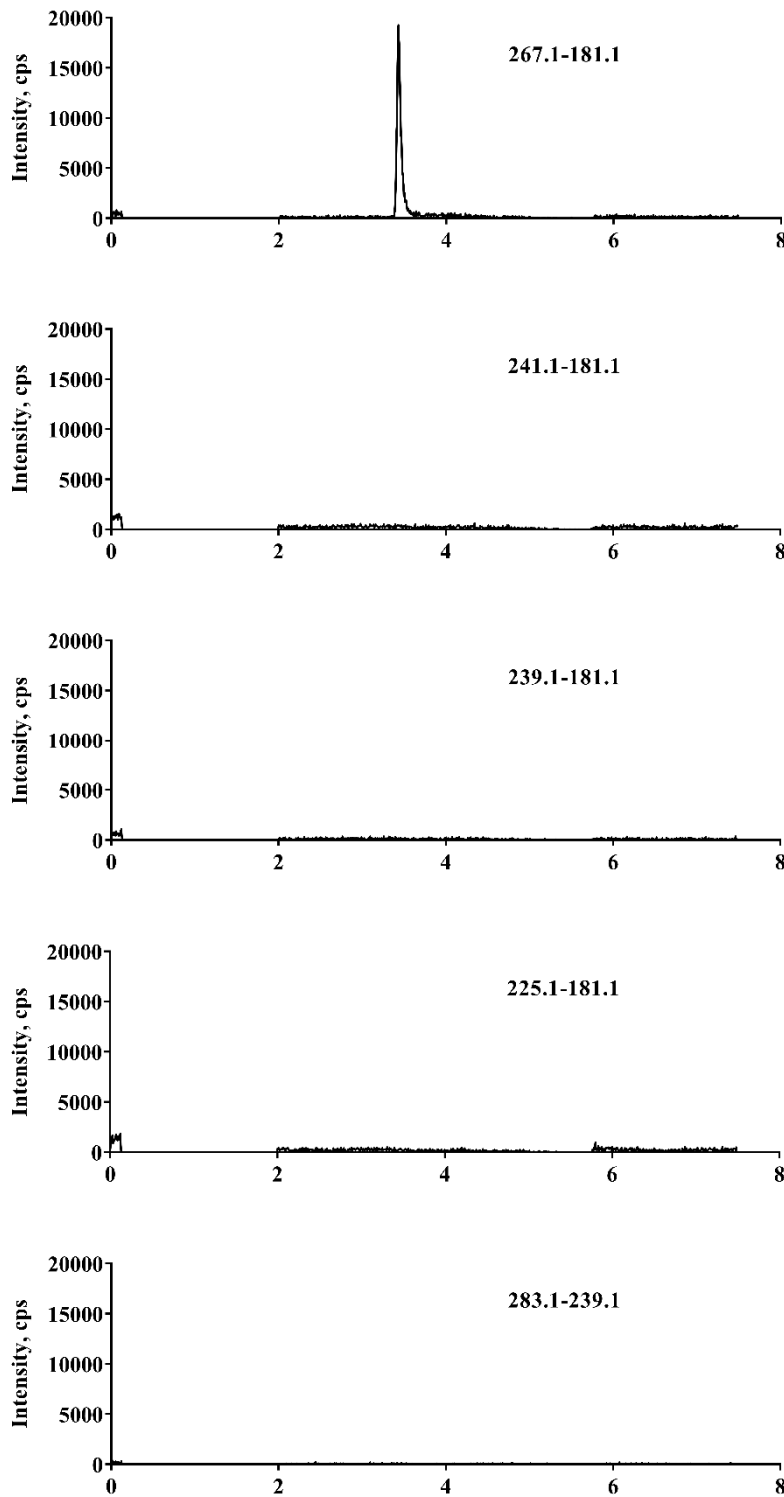

SFig. 1 Representative MRM chromatograms for DOXO and metabolites.

(A) DOXO solution (100 ng/mL)

B

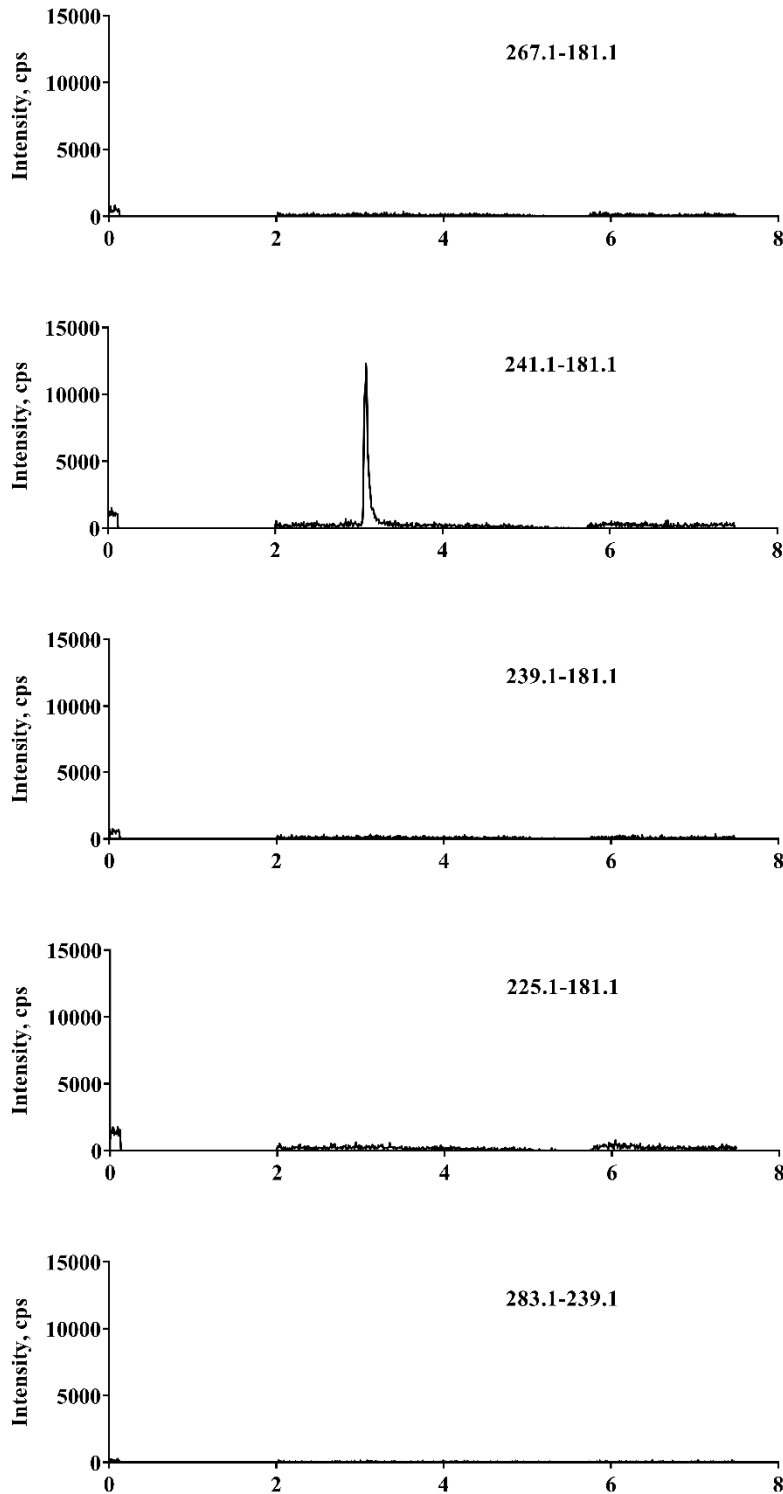

SFig. 1 Representative MRM chromatograms for DOXO and metabolites.

(B) M1 solution (100 ng/mL)

C

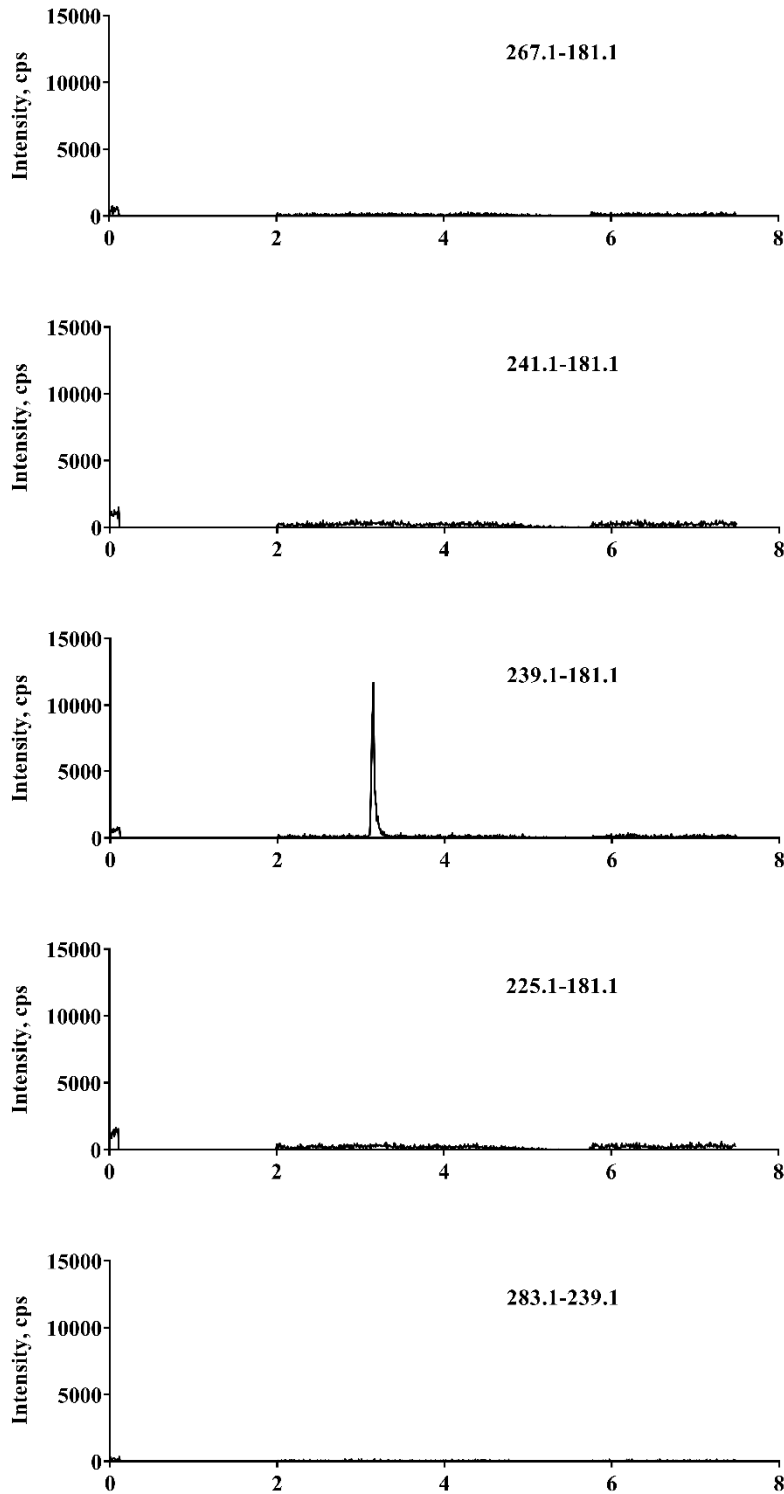

SFig. 1 Representative MRM chromatograms for DOXO and metabolites.

(C) M2 solution (100 ng/mL)

D

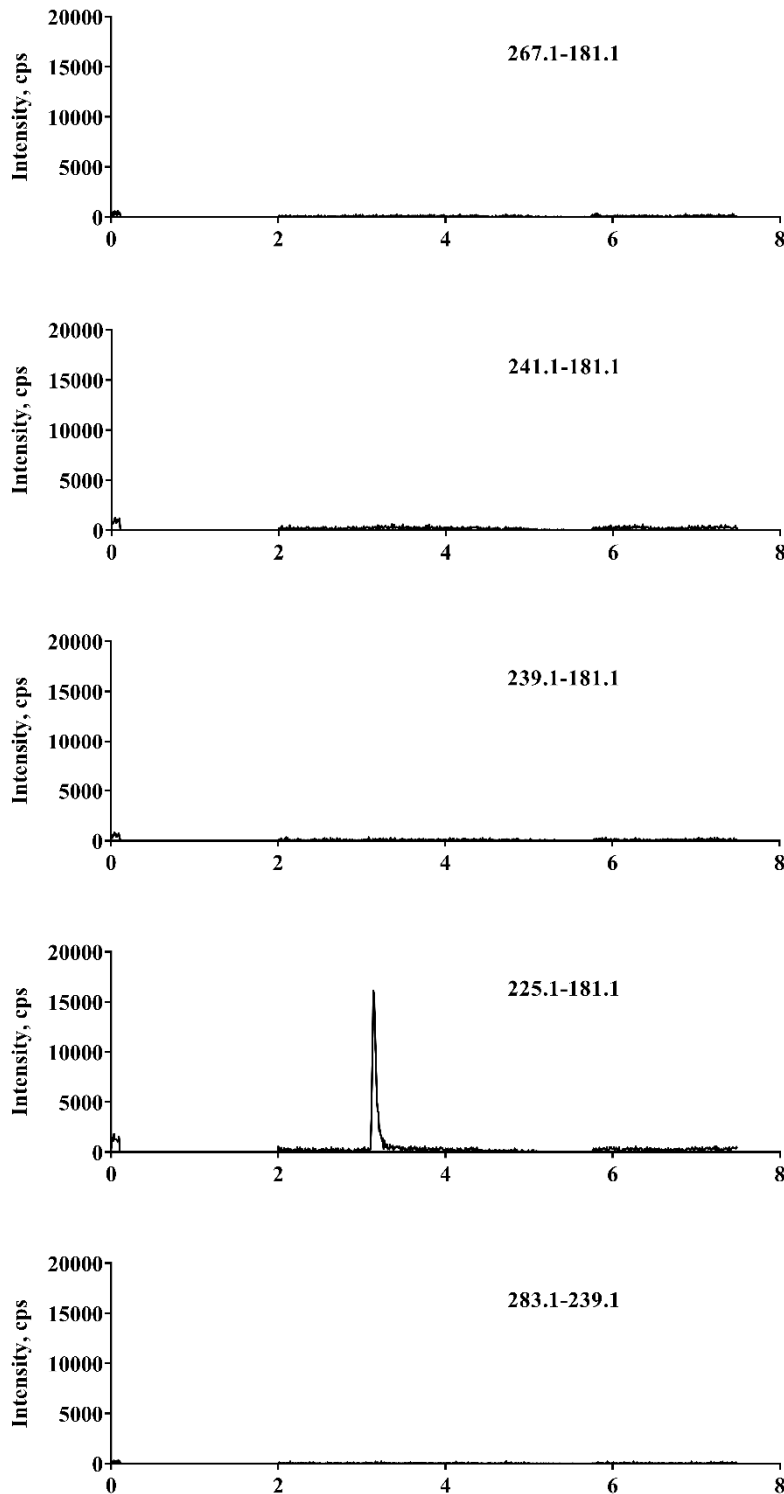

SFig. 1 Representative MRM chromatograms for DOXO and metabolites.

(D) M4 solution (100 ng/mL)

E

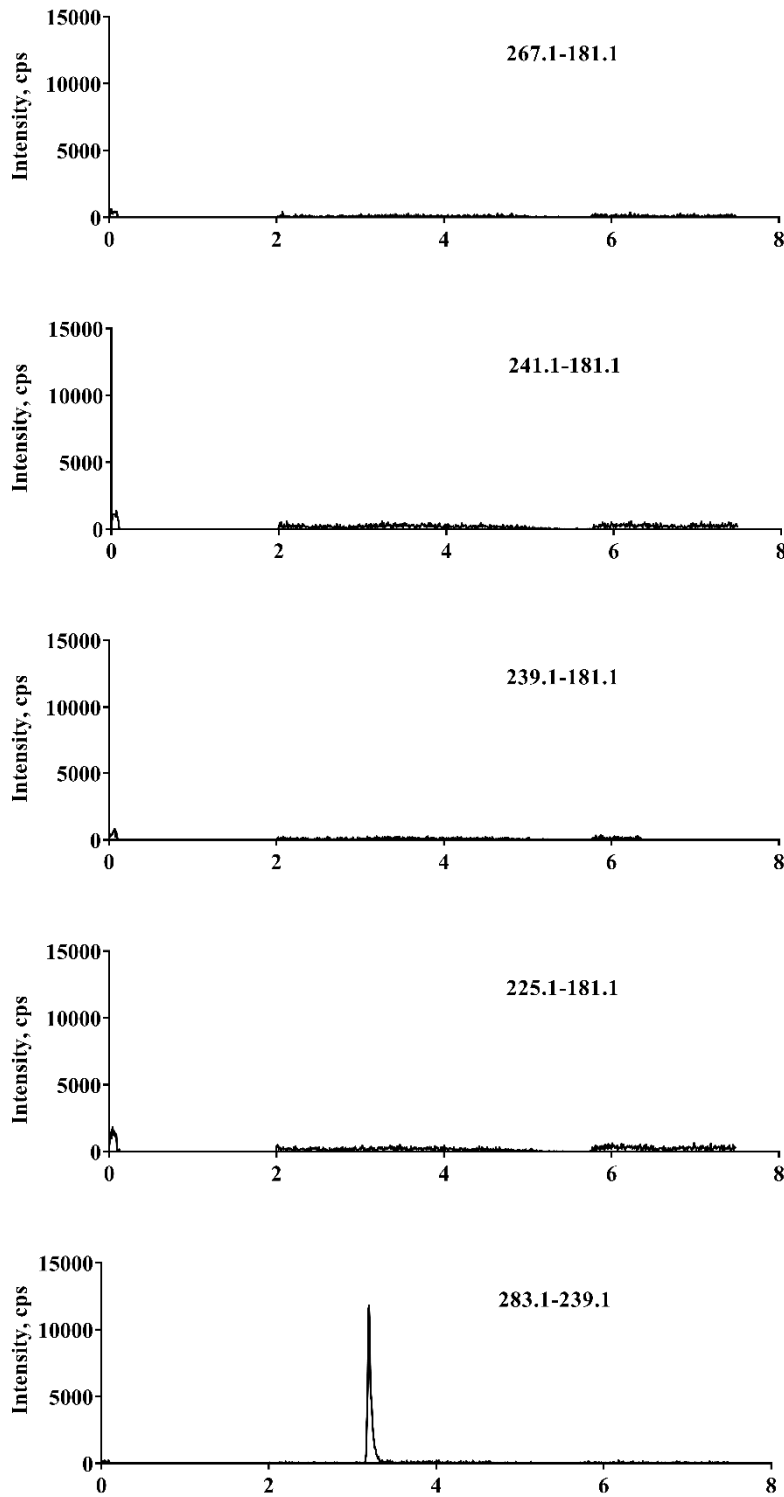

SFig. 1 Representative MRM chromatograms for DOXO and metabolites.

(E) M5 solution (100 ng/mL)

F

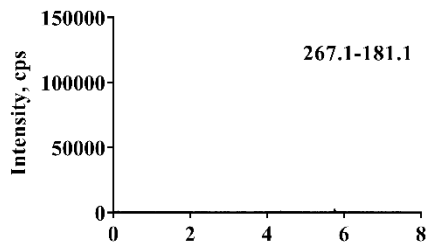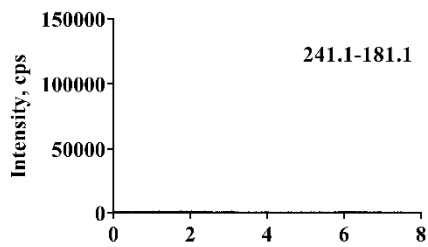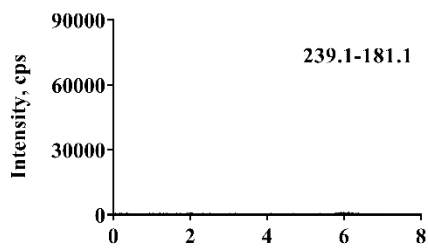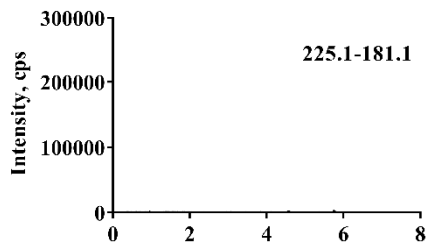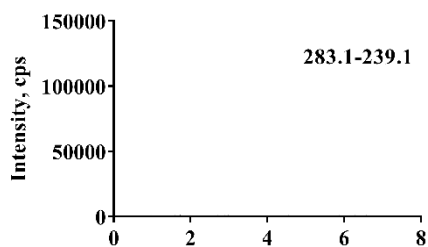

G

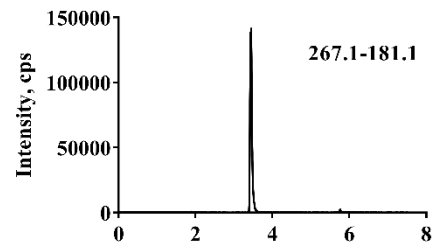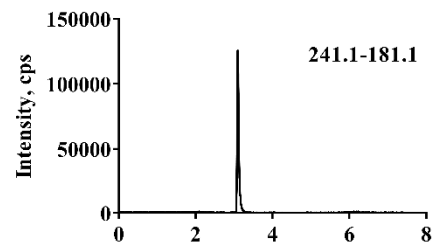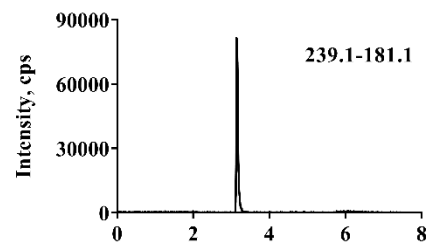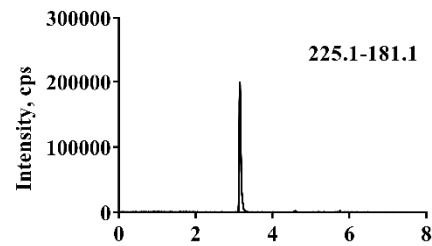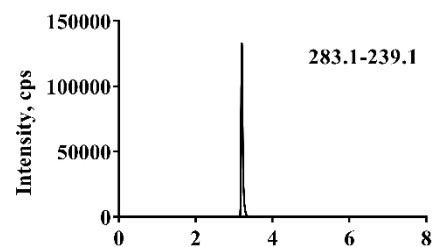

SFig. 1 Representative MRM chromatograms for DOXO and metabolites.

(F) HLM incubation, blank sample (without DOXO); (G) HLM incubation, blank sample spiked with mixture of DOXO, M1, M2, M4 and M5 (final concentration: 100 ng/ml each);

H

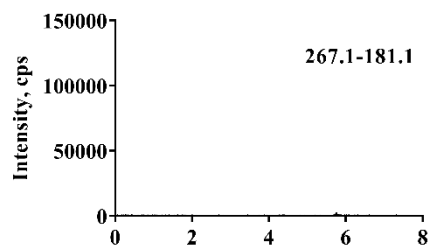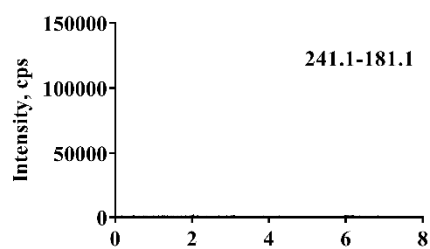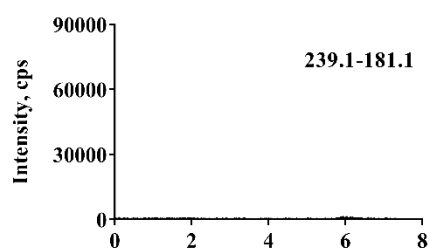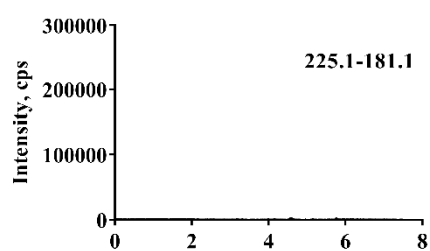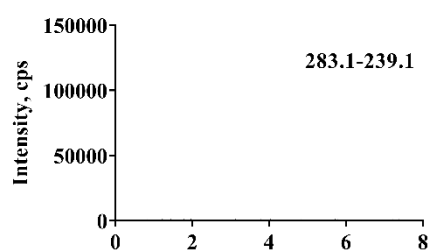

I

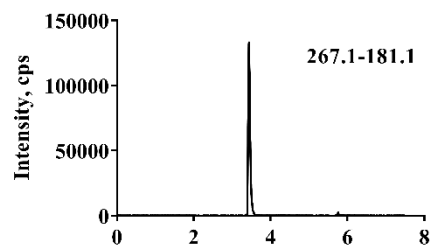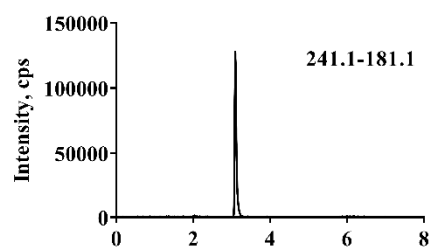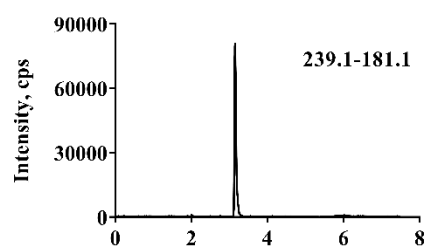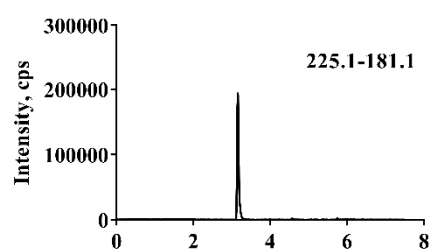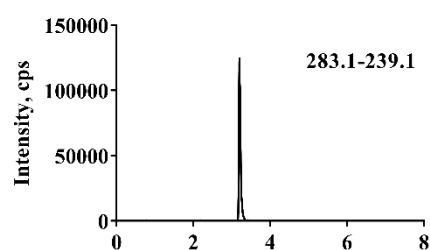

SFig. 1 Representative MRM chromatograms for DOXO and metabolites.

(H) HLS9 incubation, blank sample (without DOXO); (I) HLS9 incubation, blank sample spiked with mixture of DOXO, M1, M2, M4 and M5 (final concentration: 100 ng/ml each);



J

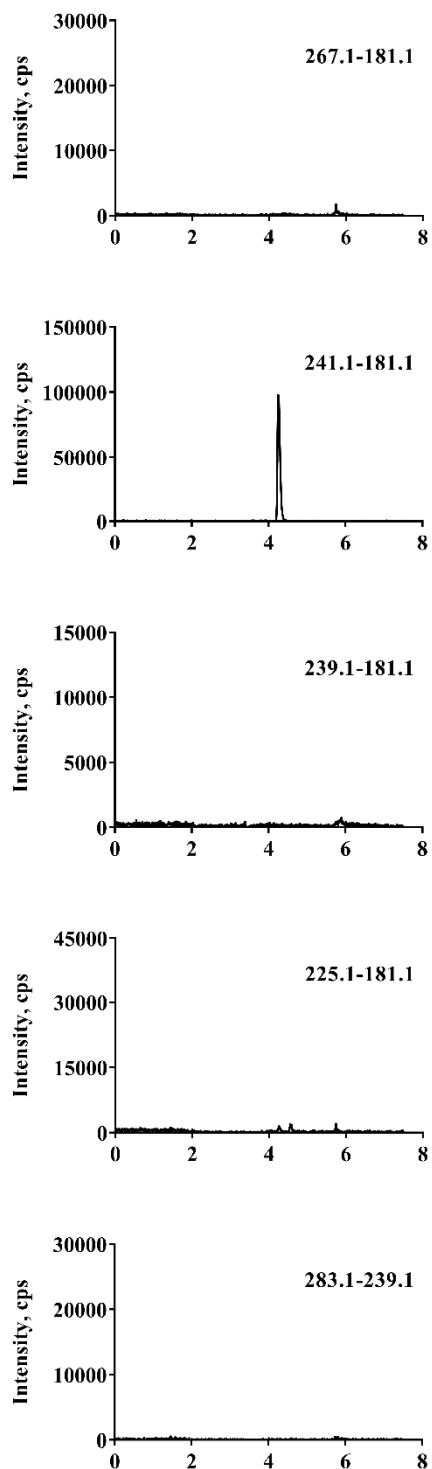

K

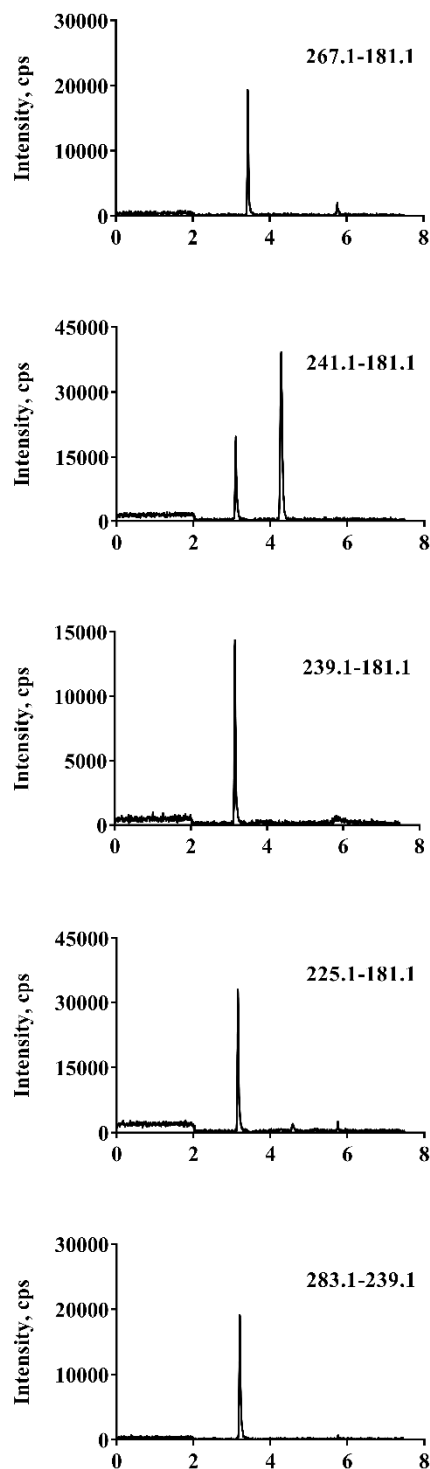

SFig. 1 Representative MRM chromatograms for DOXO and metabolites.

(J) Plasma, blank sample (non-DOXO treated),

(K) Plasma, blank sample spiked with mixture standards of DOXO, M1, M2, M4 and M5 (final plasma concentration: 100 ng/ml each).

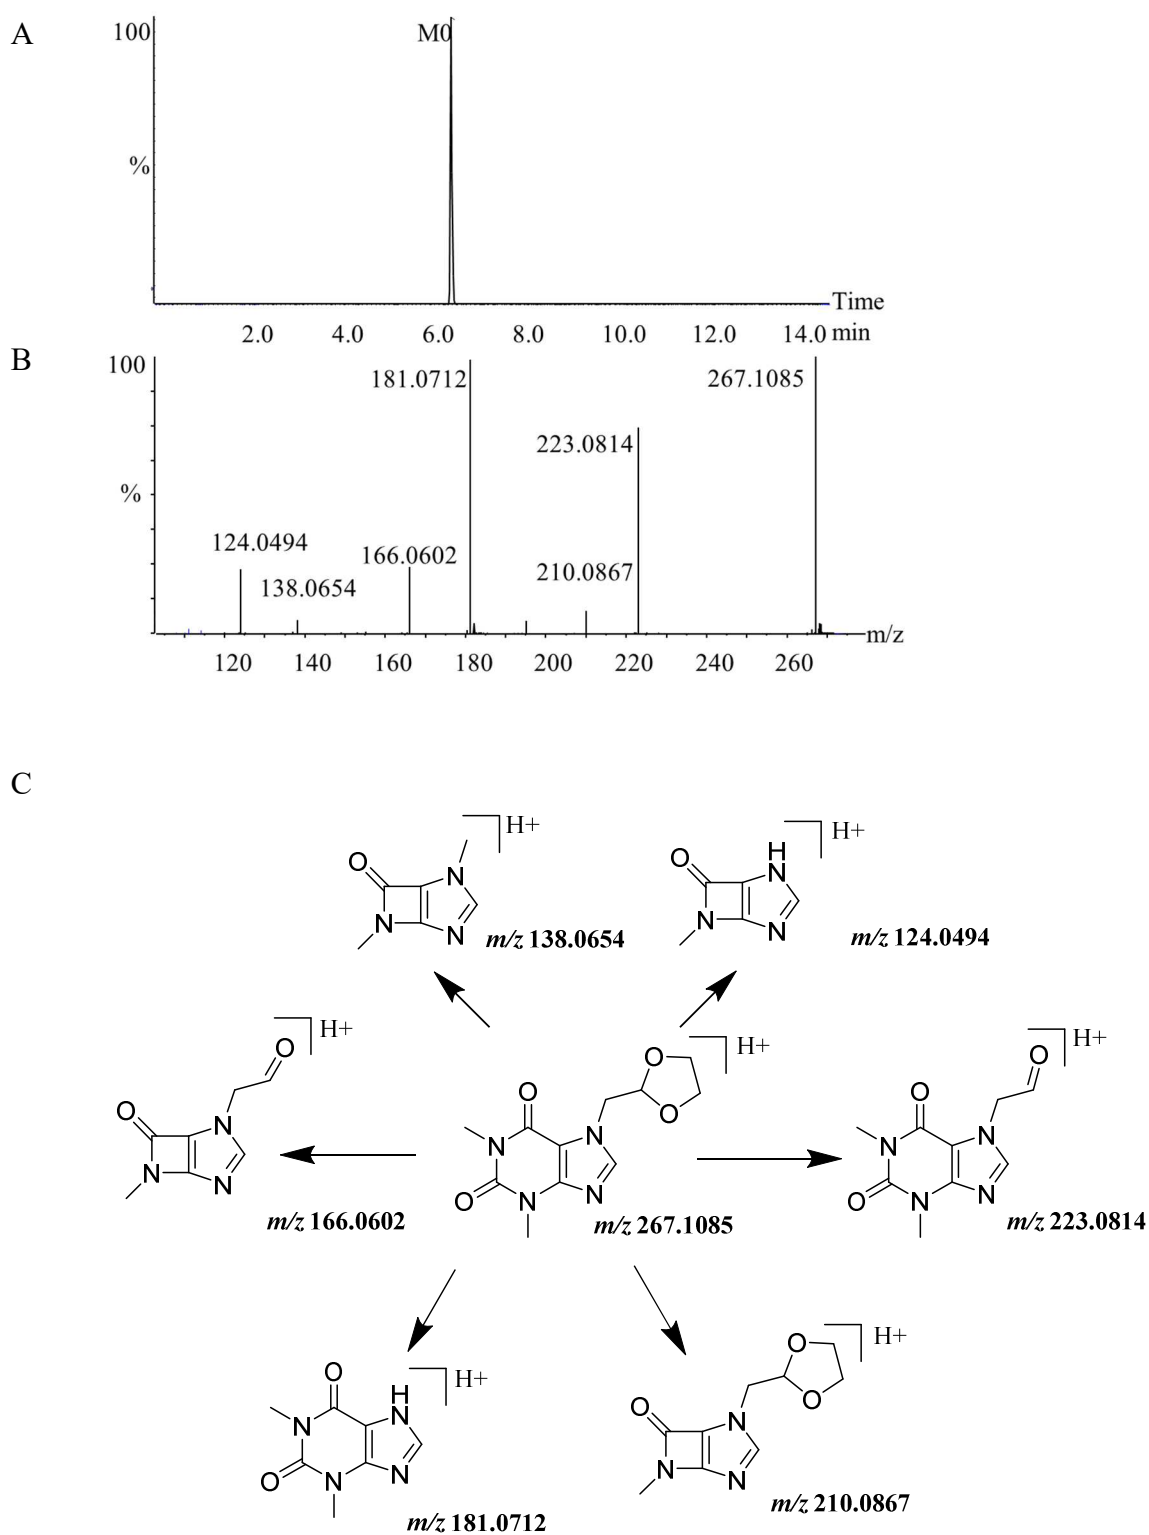

SFig. 2. Chromatography - Mass Spectrometry of DOXO obtained on LC-Triple TOF.  
(A) Chromatographic graph of DOXO;  
(B) MS<sup>2</sup> spectrum of DOXO in the positive ion mode.  
(C) Tentative structural illustration of the most informative fragment ions for DOXO.

## Theophylline acetaldehyde as the initial product in doxophylline metabolism in human liver

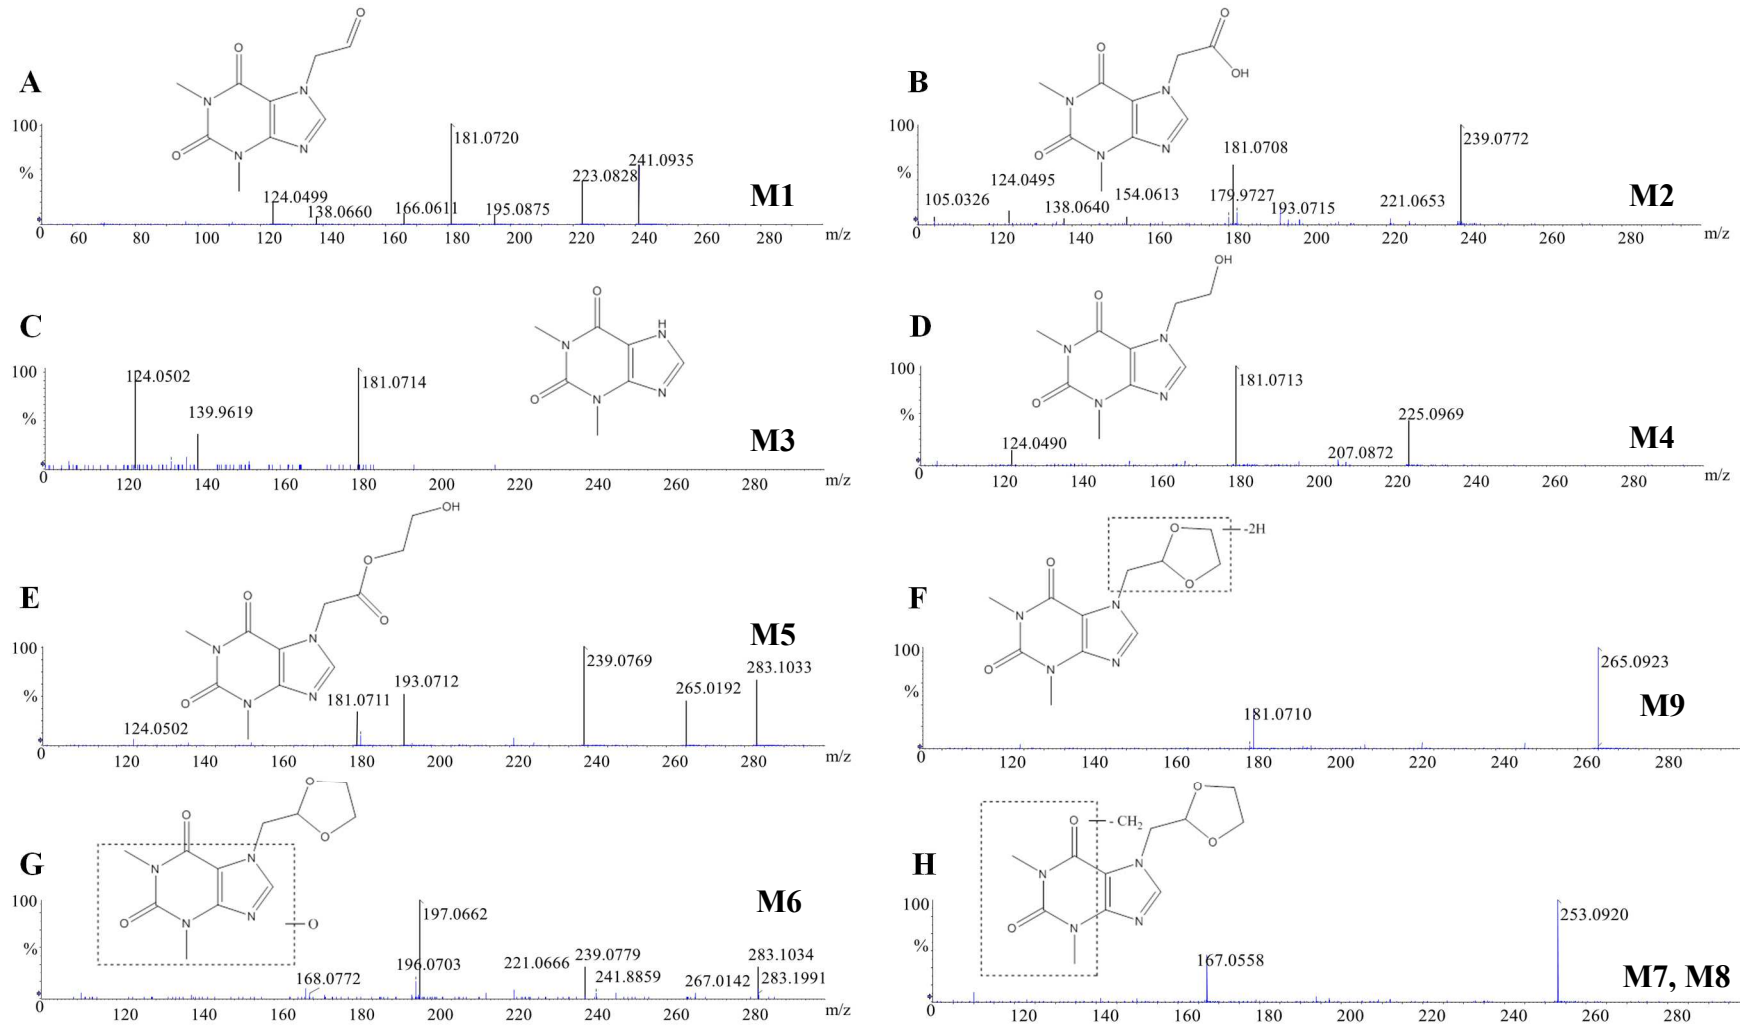

Sfig. 3. The MS2 spectra of representative metabolites in HLM. (A) M1; (B) M2; (C) M3; (D) M4; (E) M5; (F) M9; (G) M6; (H) M7 and M8.

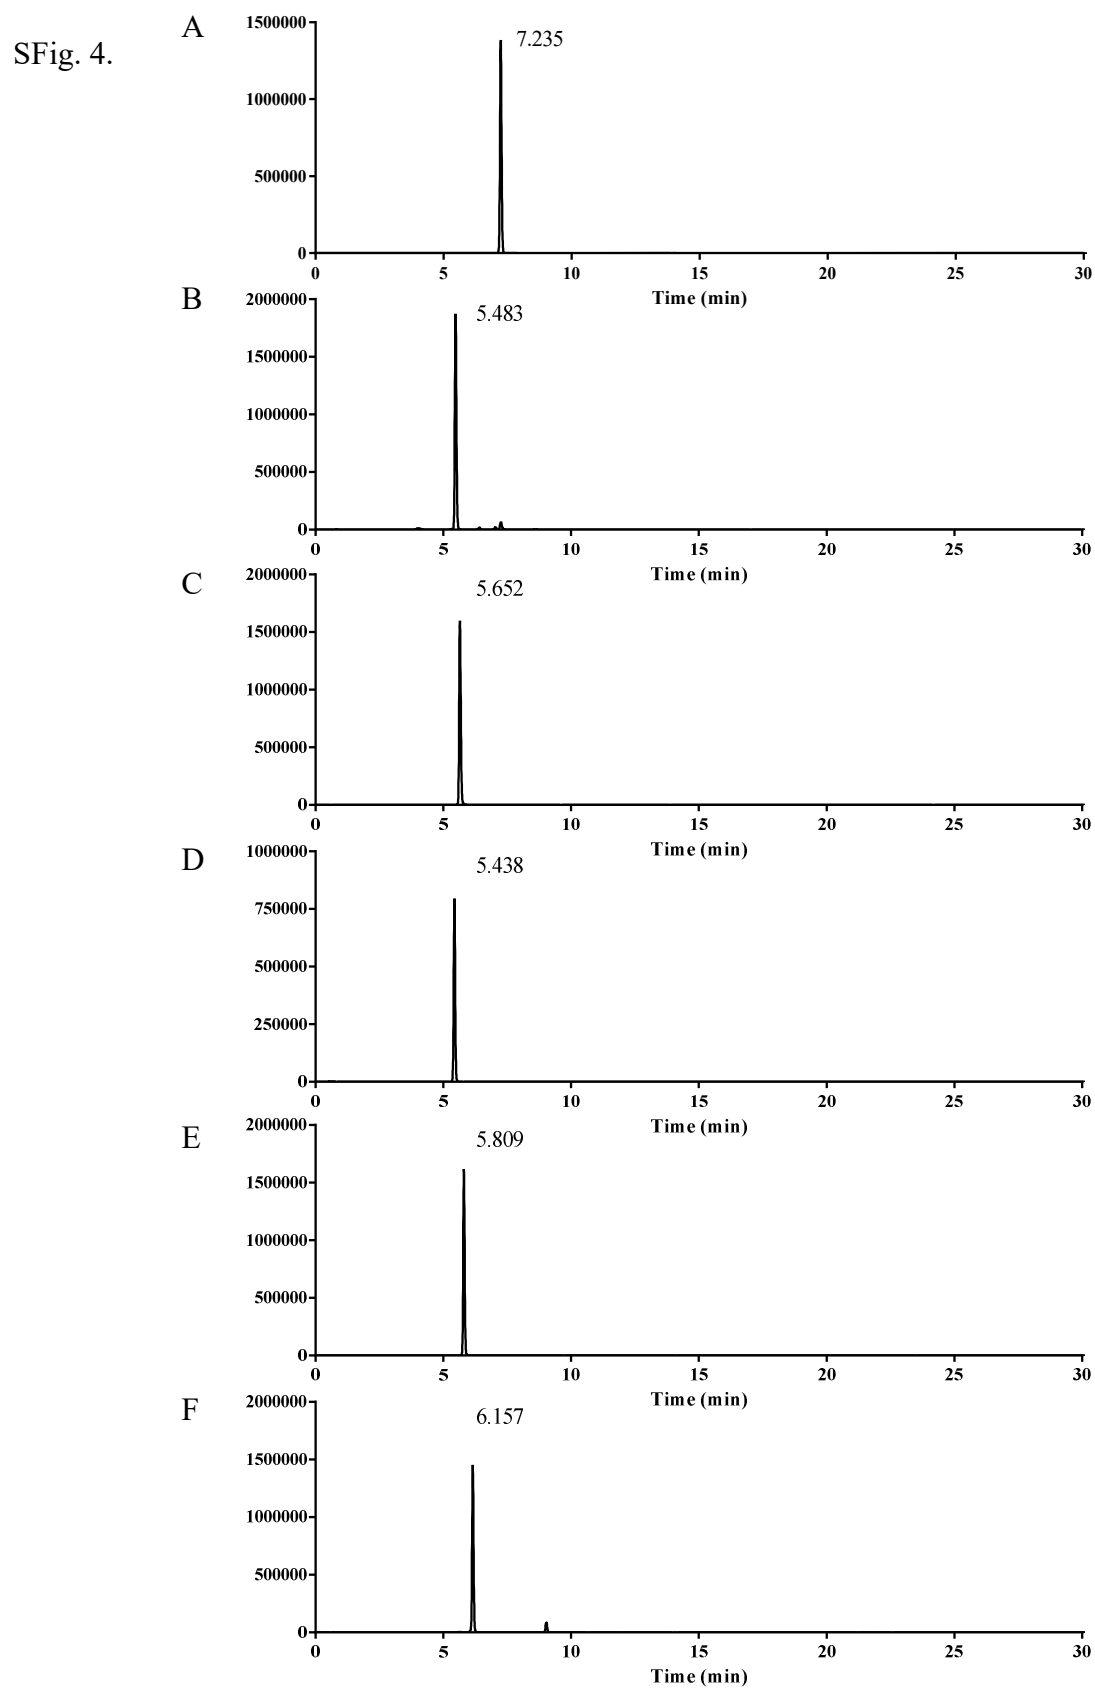

SFig. 4. Chromatography of purity test for reference standards used in the study. (A) DOXO; (B) M1; (C) M2; (D) M3; (E) M4; (F) M5.

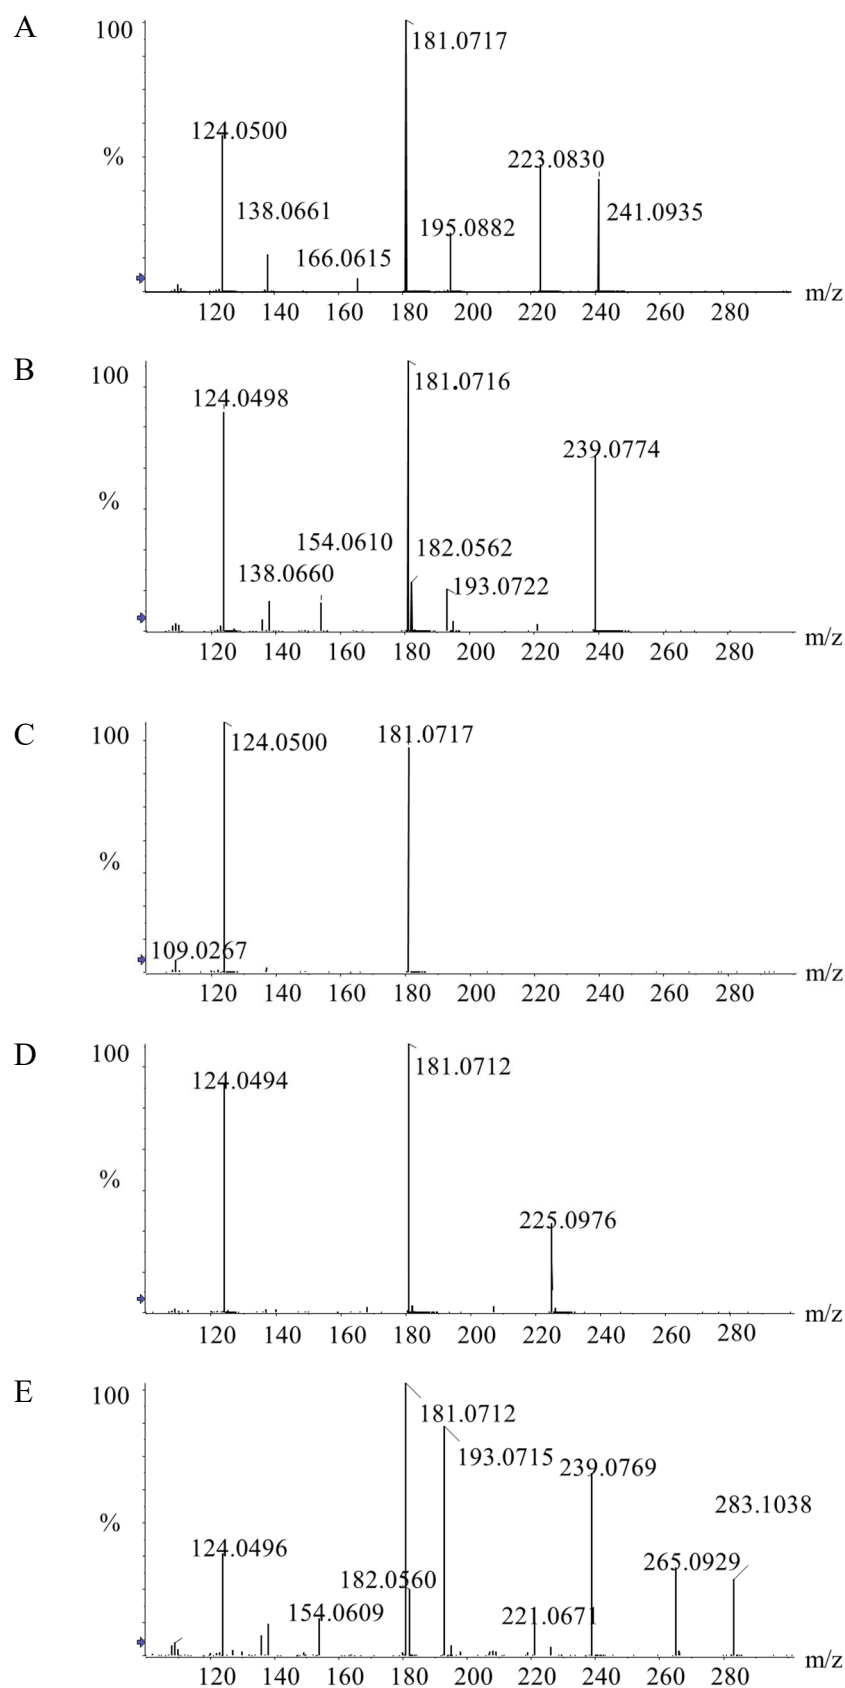

SFig. 5. The MS<sup>2</sup> spectra for reference standards obtained on LC-Triple TOF. (A) M1; (B) M2; (C) M3; (D) M4; (E) M5.

A

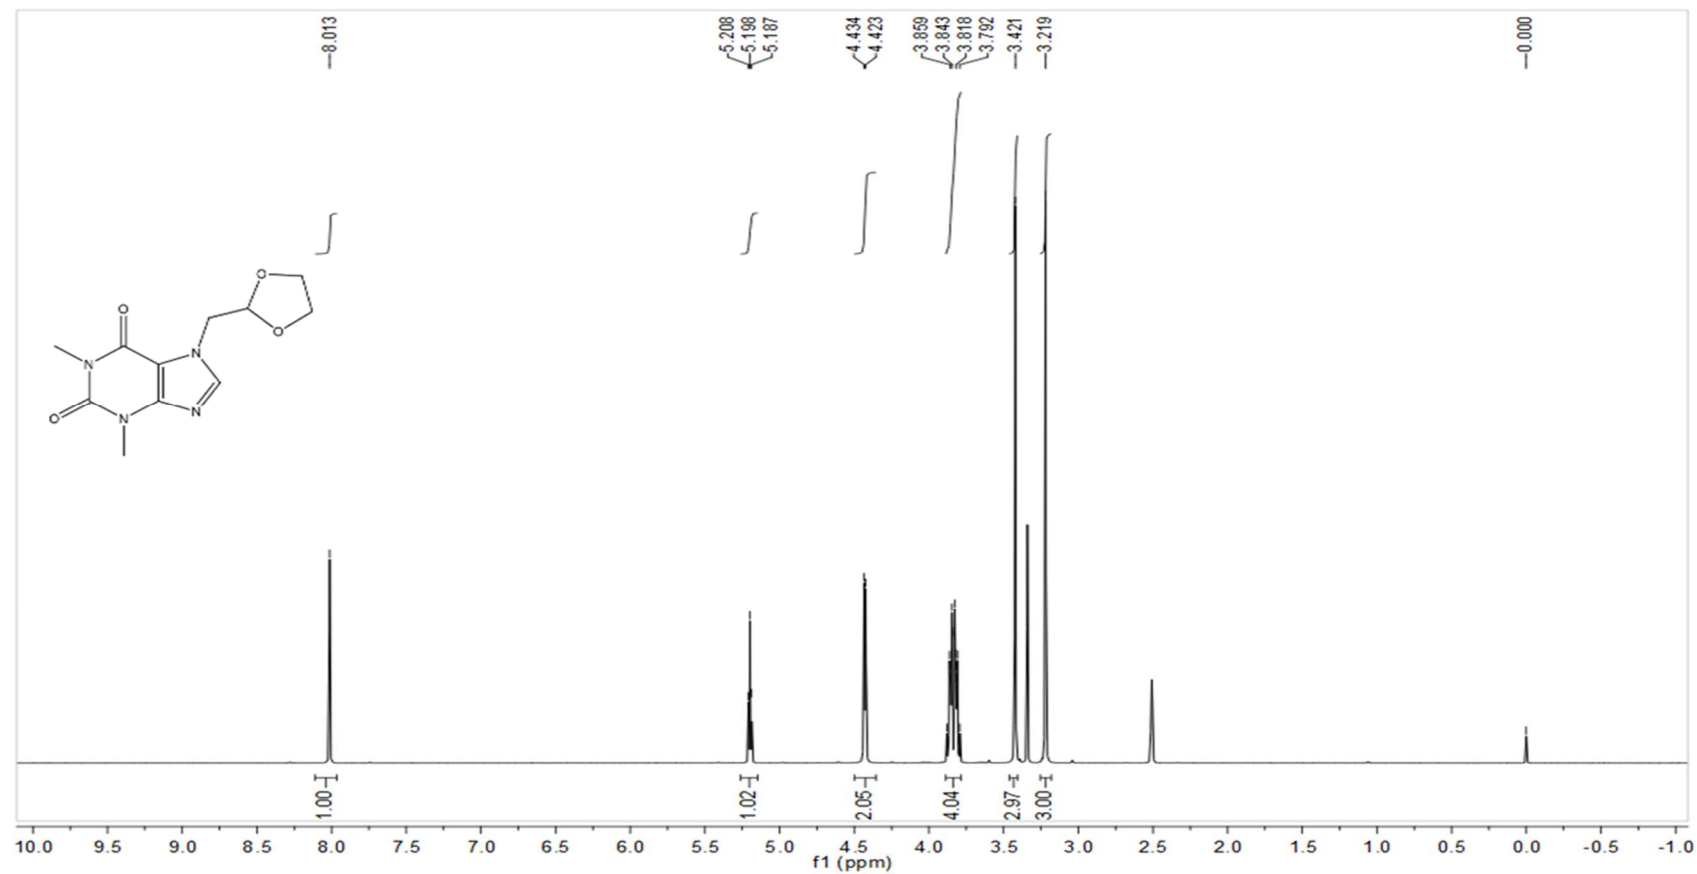

$^1\text{H}$  NMR (400 MHz, DMSO)  $\delta$  8.01 (s, 1H), 5.20 (t,  $J = 4.2$  Hz, 1H), 4.43 (d,  $J = 4.2$  Hz, 2H), 3.84 (m, 4H), 3.42 (s, 3H), 3.22 (s, 3H).

SFig. 6. The  $^1\text{H}$ -NMR for reference standards. (A) DOXO

B

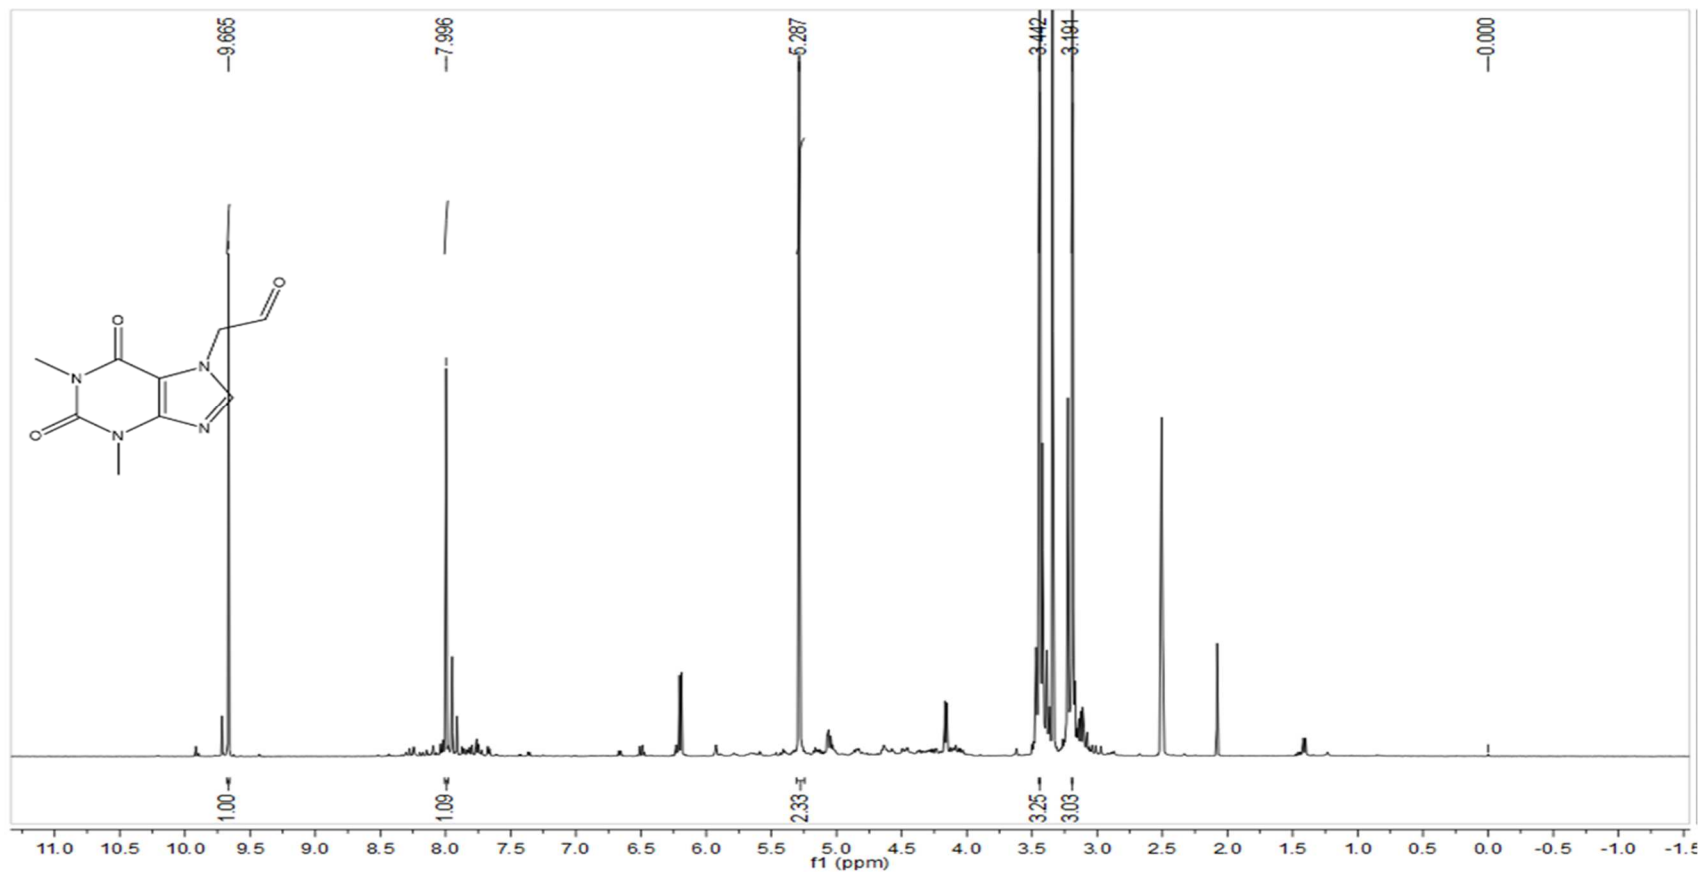

$^1\text{H}$  NMR (400 MHz, DMSO)  $\delta$  9.67 (s, 1H), 8.00 (s, 1H), 5.29 (s, 2H), 3.44 (s, 3H), 3.19 (s, 3H).

SFig. 6. The  $^1\text{H}$ -NMR for reference standards. (B) M1;

C

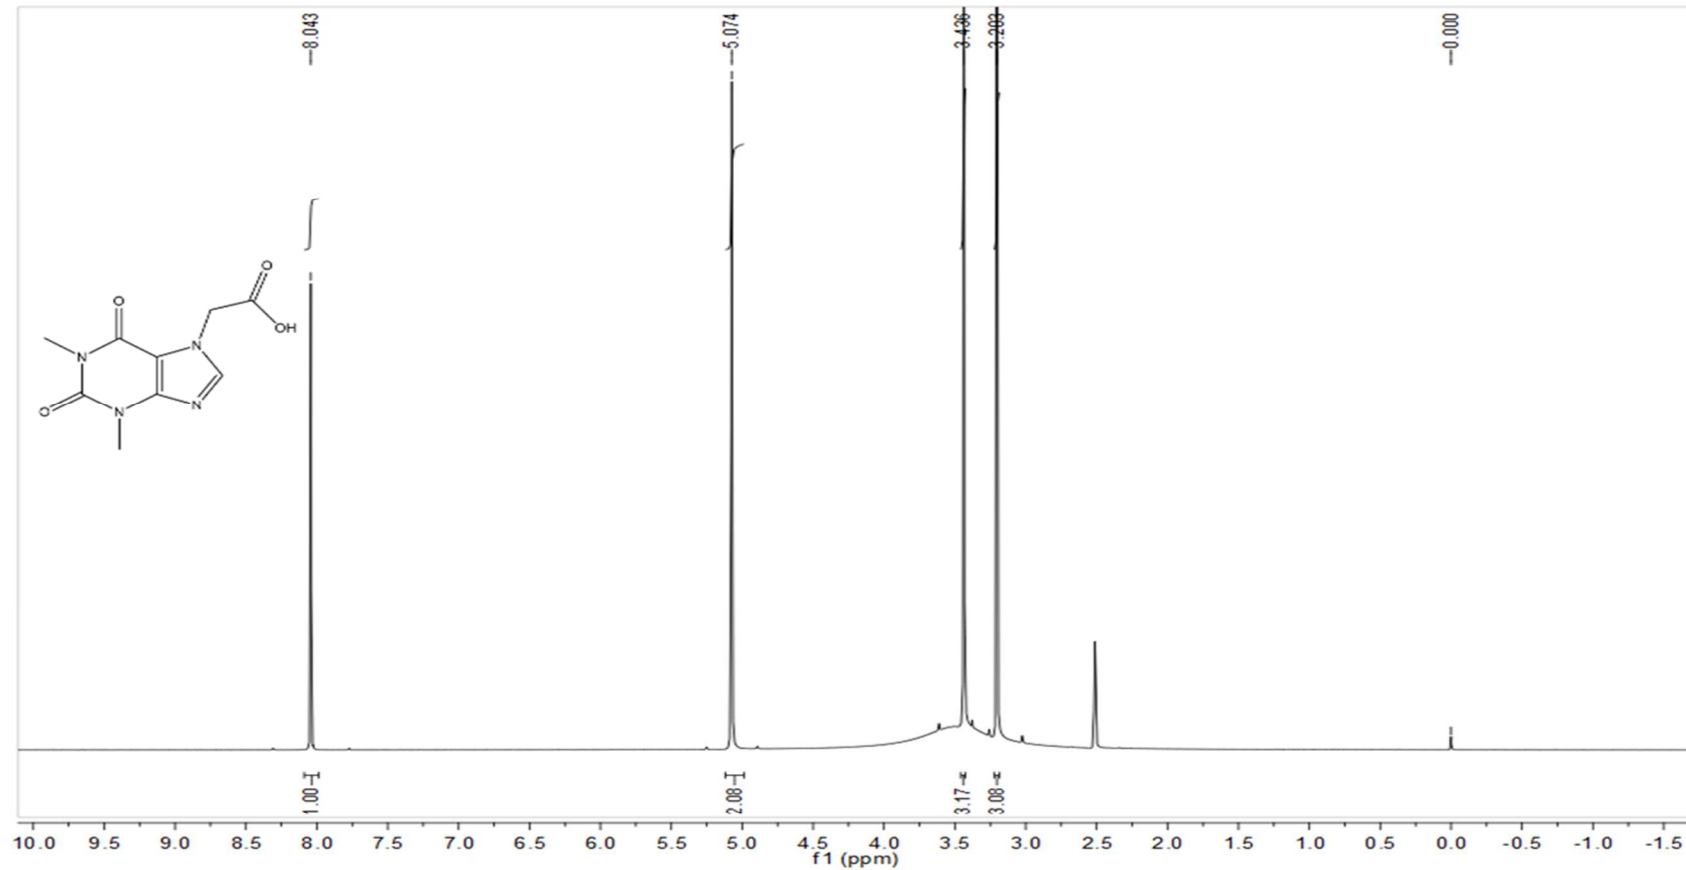

$^1\text{H}$  NMR (400 MHz, DMSO)  $\delta$  8.04 (s, 1H), 5.07 (s, 2H), 3.44 (s, 3H), 3.20 (s, 3H).

SFig. 6. The  $^1\text{H}$ -NMR for reference standards. (C) M2;



D

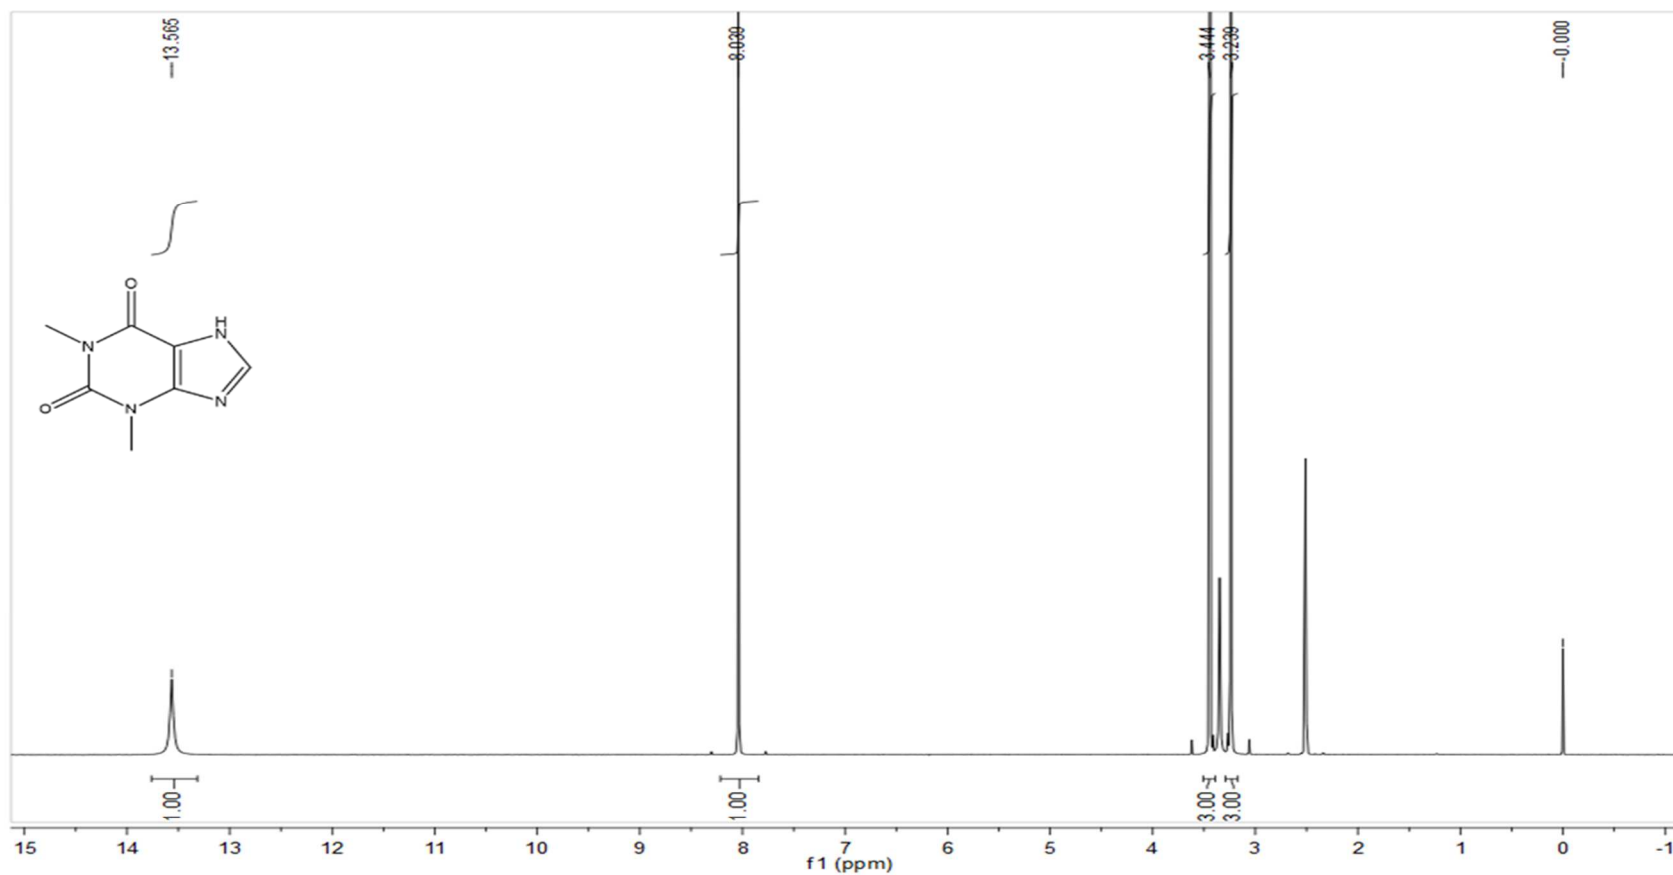

$^1\text{H}$  NMR (400 MHz, DMSO)  $\delta$  13.56 (s, 1H), 8.04 (s, 1H), 3.44 (s, 3H), 3.24 (s, 3H).

SFig. 6. The  $^1\text{H}$ -NMR for reference standards. (D) M3;

E

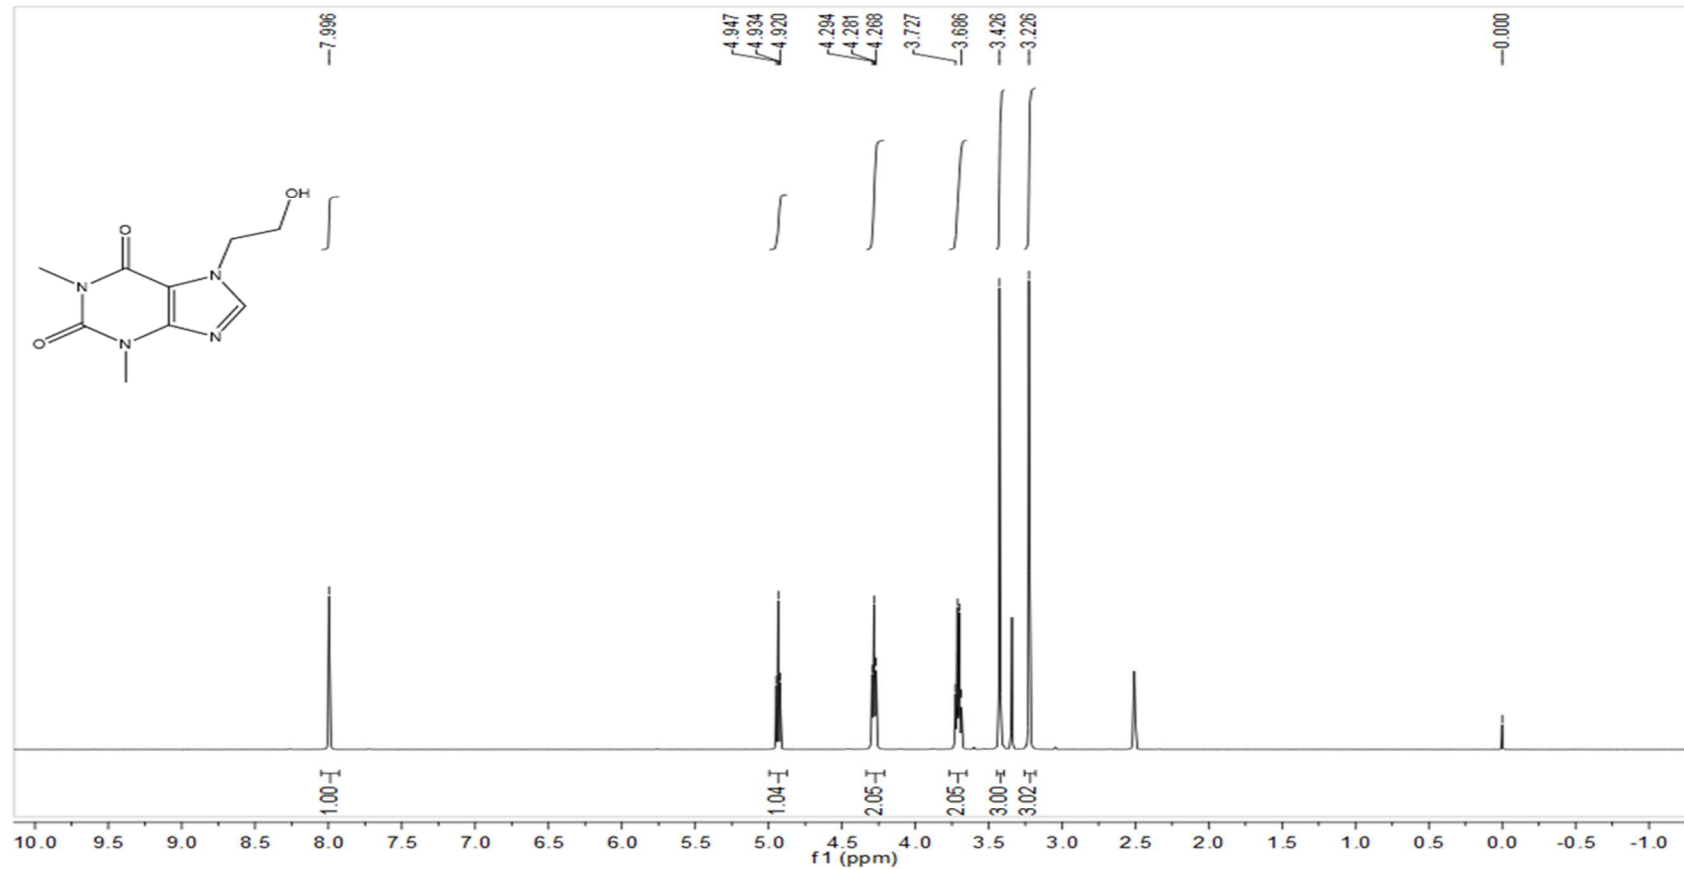

<sup>1</sup>H NMR (400 MHz, DMSO)  $\delta$  8.00 (s, 1H), 4.93 (t,  $J = 5.4$  Hz, 1H), 4.28 (t,  $J = 5.3$  Hz, 2H), 3.71 (m, 2H), 3.43 (s, 3H), 3.23 (s, 3H).

SFig. 6. The <sup>1</sup>H-NMR for reference standards. (E) M4;

F

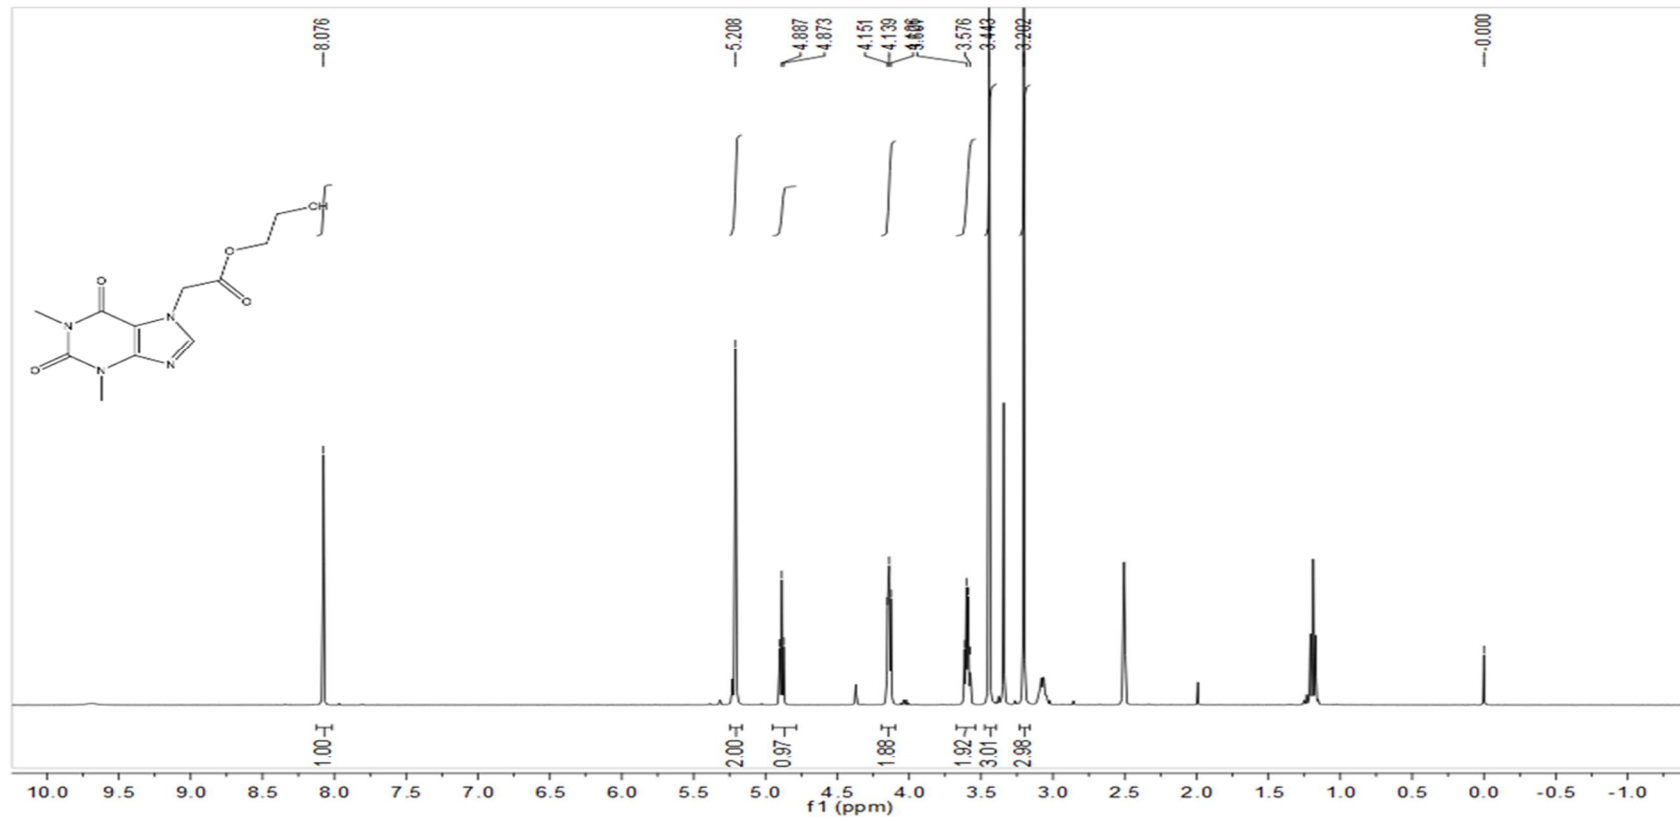

<sup>1</sup>H NMR (400 MHz, DMSO)  $\delta$  8.08 (s, 1H), 5.21 (s, 2H), 4.89 (t,  $J = 5.5$  Hz, 1H), 4.14 (m, 2H), 3.60 (dd,  $J = 10.2, 5.4$  Hz, 2H), 3.44 (s, 3H), 3.20 (s, 3H).

SFig. 6. The <sup>1</sup>H-NMR for reference standards. (F) M5.

A

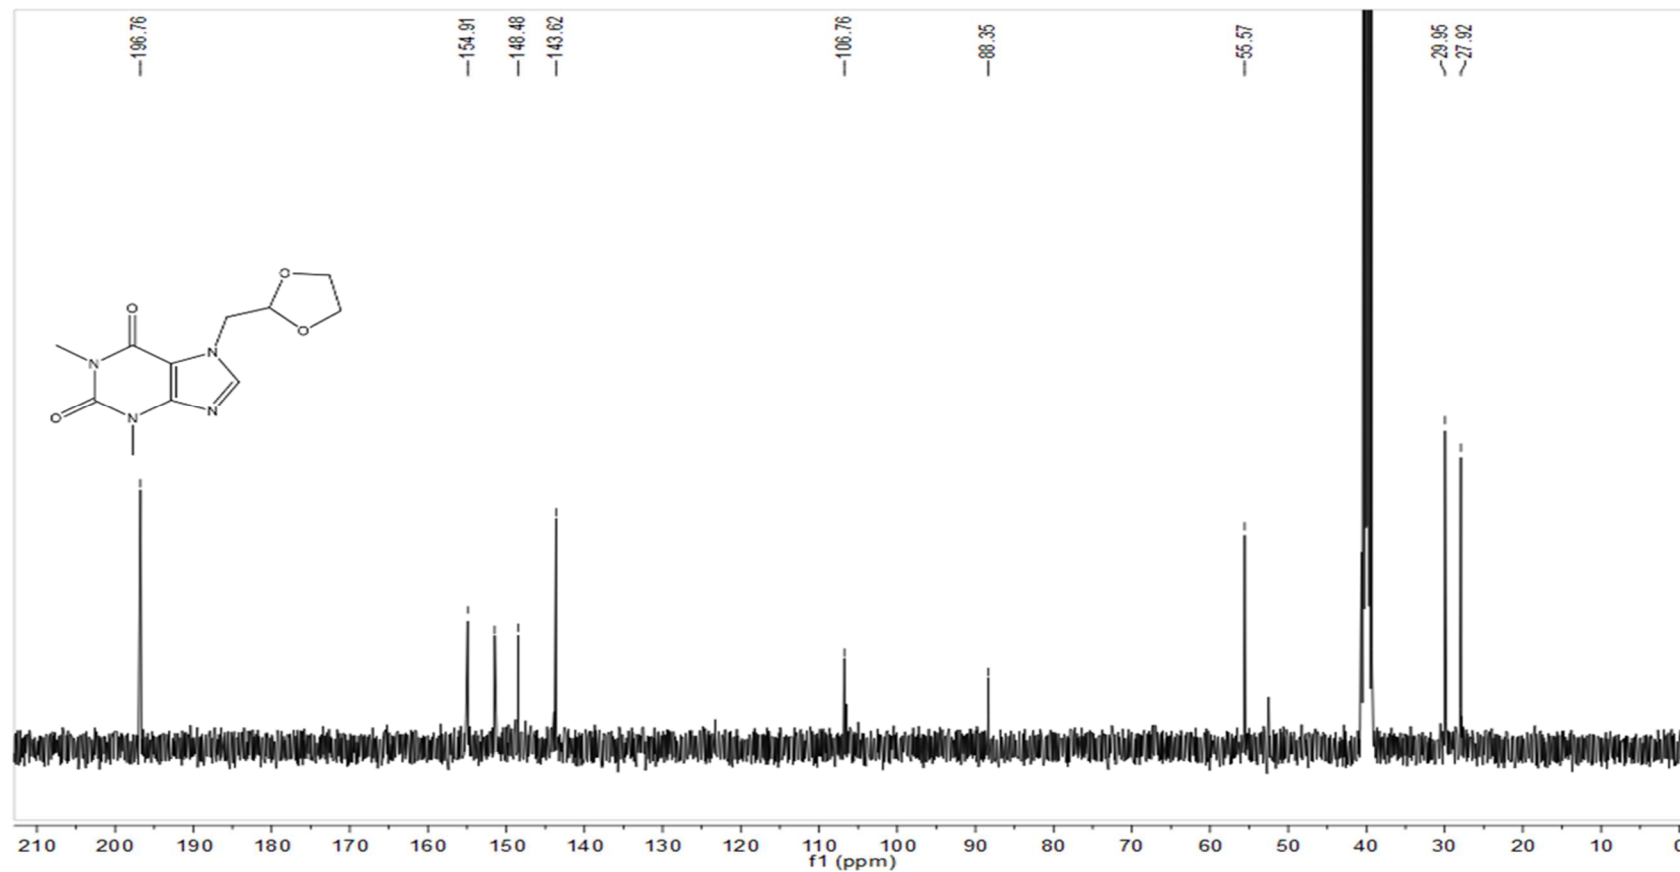

$^{13}\text{C}$  NMR (101 MHz, DMSO)  $\delta$  196.76, 154.91, 151.47, 148.48, 143.62, 106.76, 88.35, 55.57, 29.95, 27.92.

SFig. 7. The  $^{13}\text{C}$ -NMR for reference standards. (A) DOXO;

B

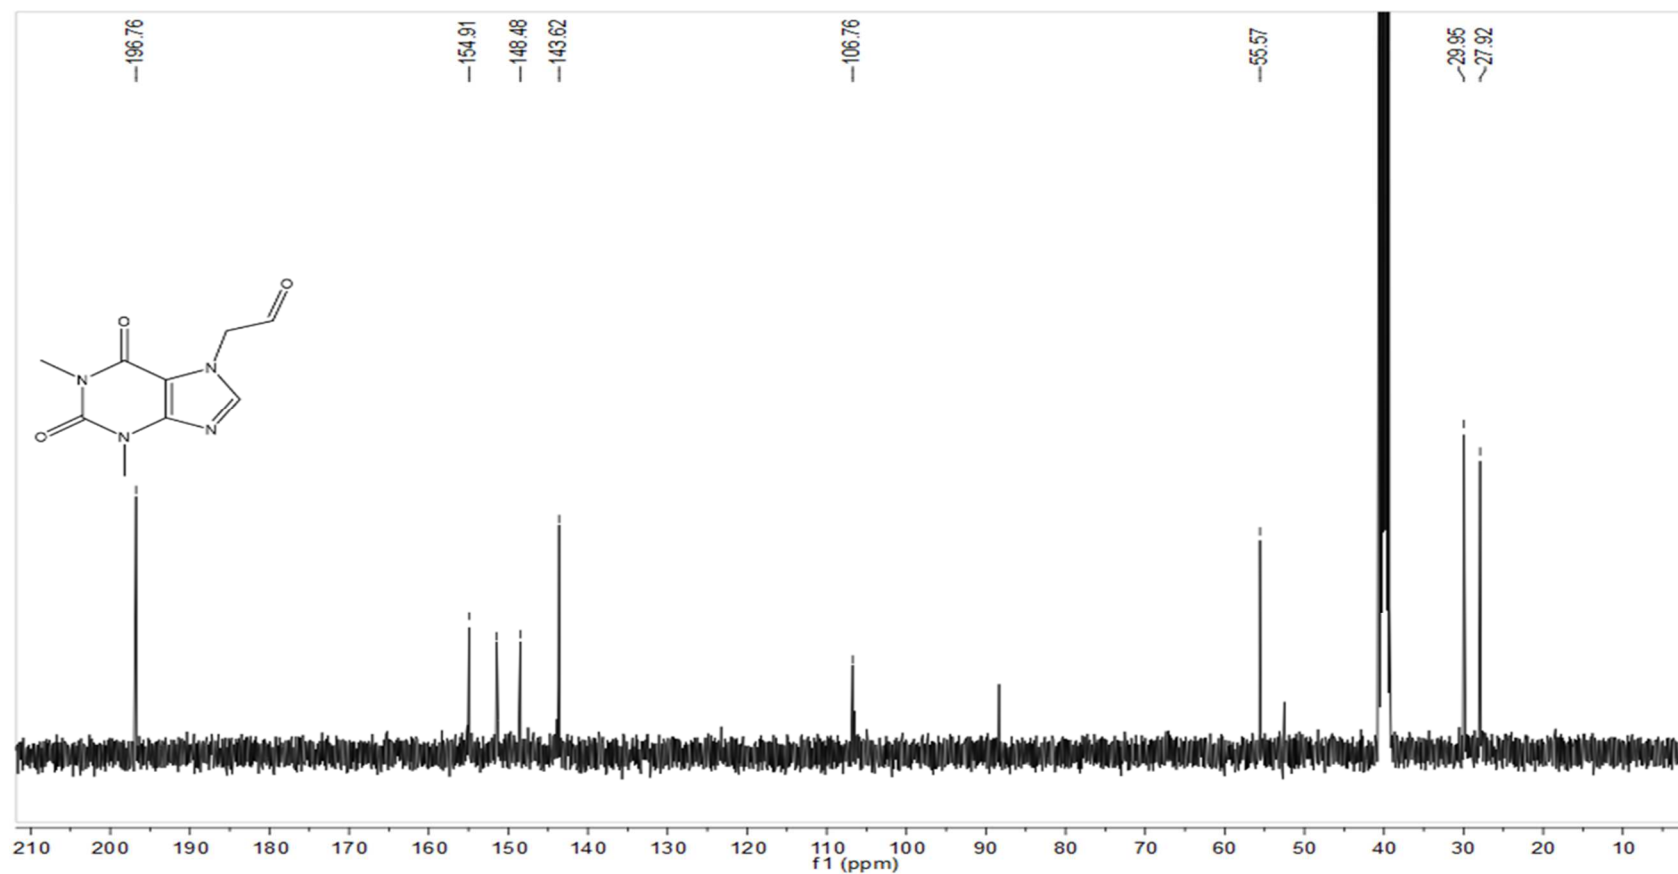

$^{13}\text{C}$  NMR (101 MHz, DMSO)  $\delta$  196.76, 154.91, 151.47, 148.48, 143.62, 106.76, 55.57, 29.95, 27.92.

SFig. 7. The  $^{13}\text{C}$ -NMR for reference standards. (B) M1;

C

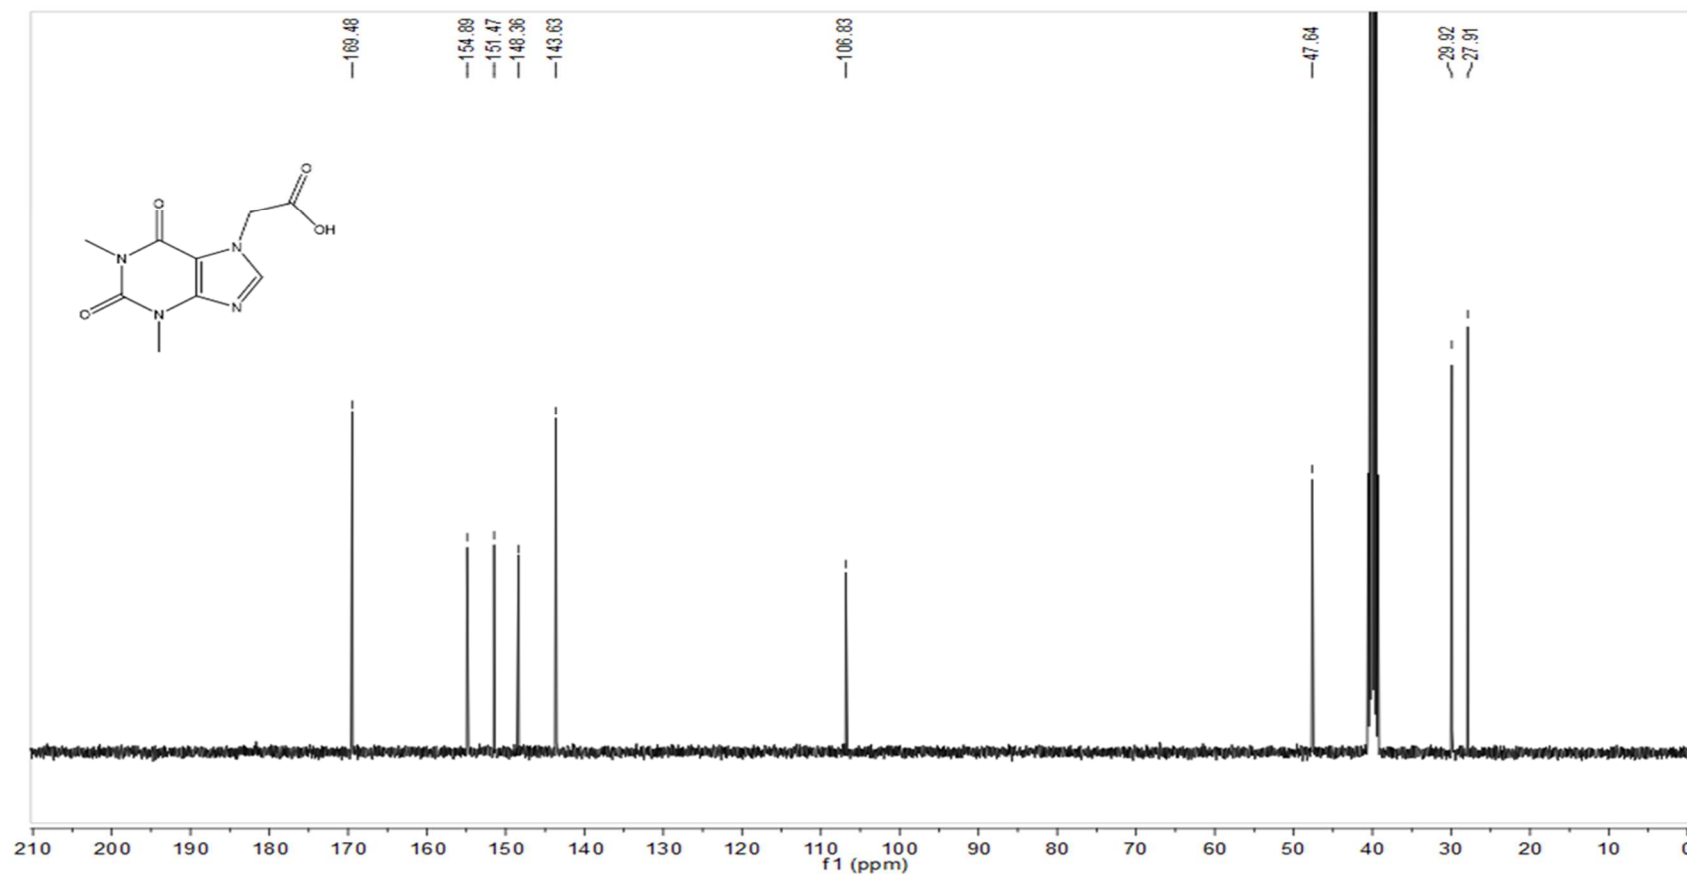

$^{13}\text{C}$  NMR (101 MHz, DMSO)  $\delta$  169.48, 154.89, 151.47, 148.36, 143.63, 106.83, 47.64, 29.92, 27.91.

SFig. 7. The  $^{13}\text{C}$ -NMR for reference standards. (C) M2;

D

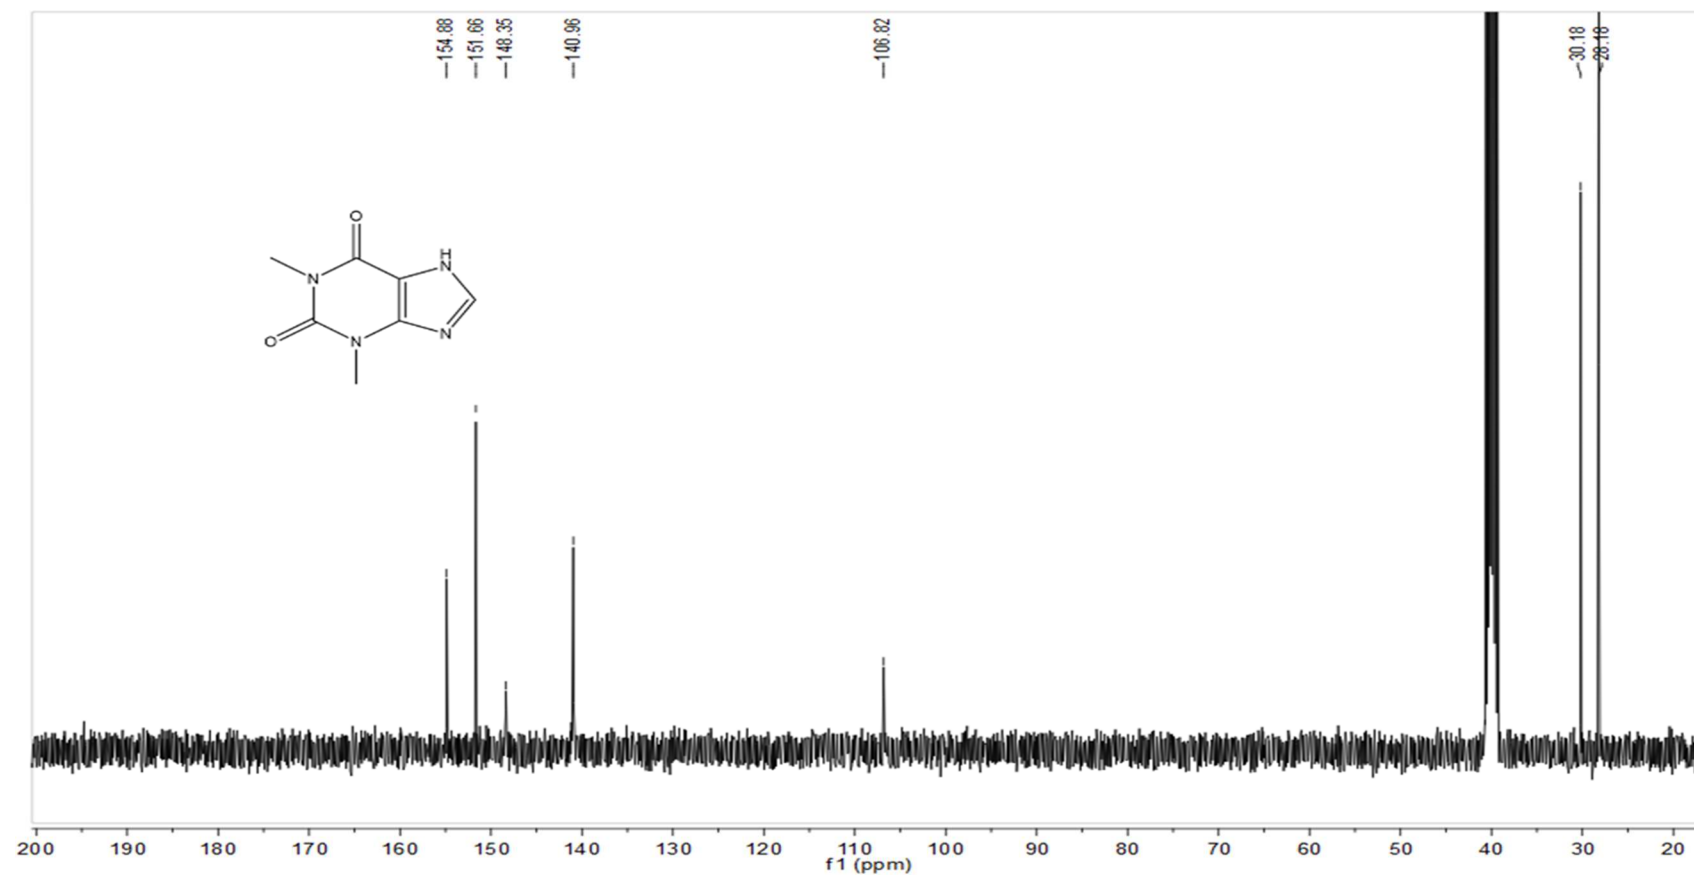

$^{13}\text{C}$  NMR (101 MHz, DMSO)  $\delta$  154.88, 151.66, 148.35, 140.96, 106.82, 30.18, 28.18.

SFig. 7. The  $^{13}\text{C}$ -NMR for reference standards. (D) M3;

E

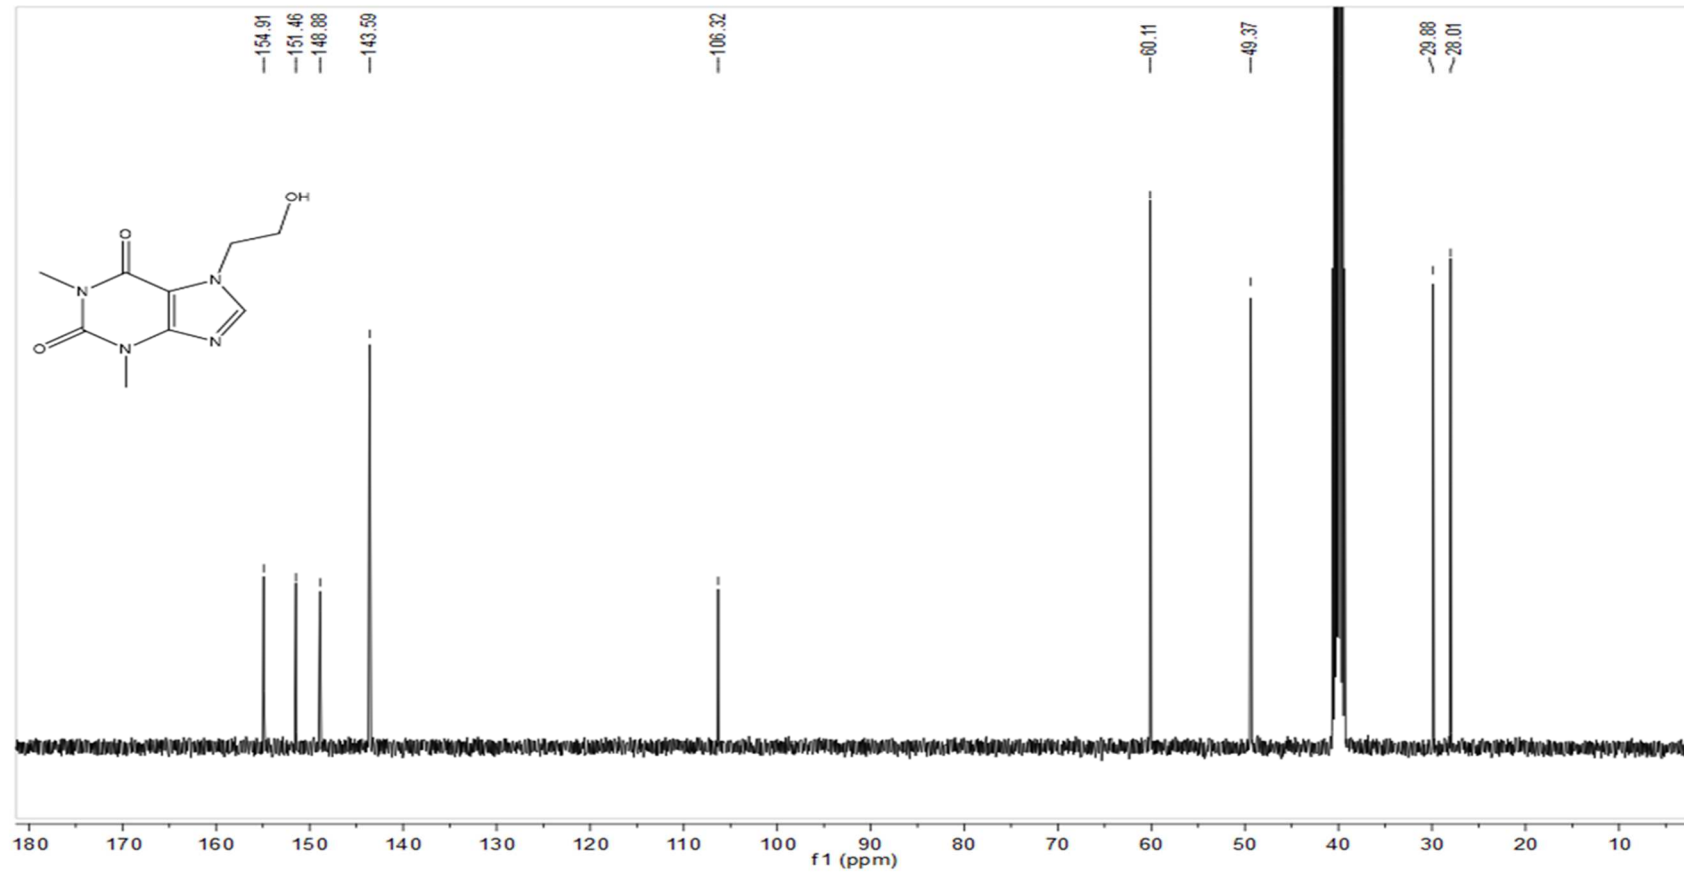

$^{13}\text{C}$  NMR (101 MHz, DMSO)  $\delta$  154.91, 151.46, 148.88, 143.59, 106.32, 60.11, 49.37, 29.88, 28.01.

SFig. 7. The  $^{13}\text{C}$ -NMR for reference standards. (E) M4;



F

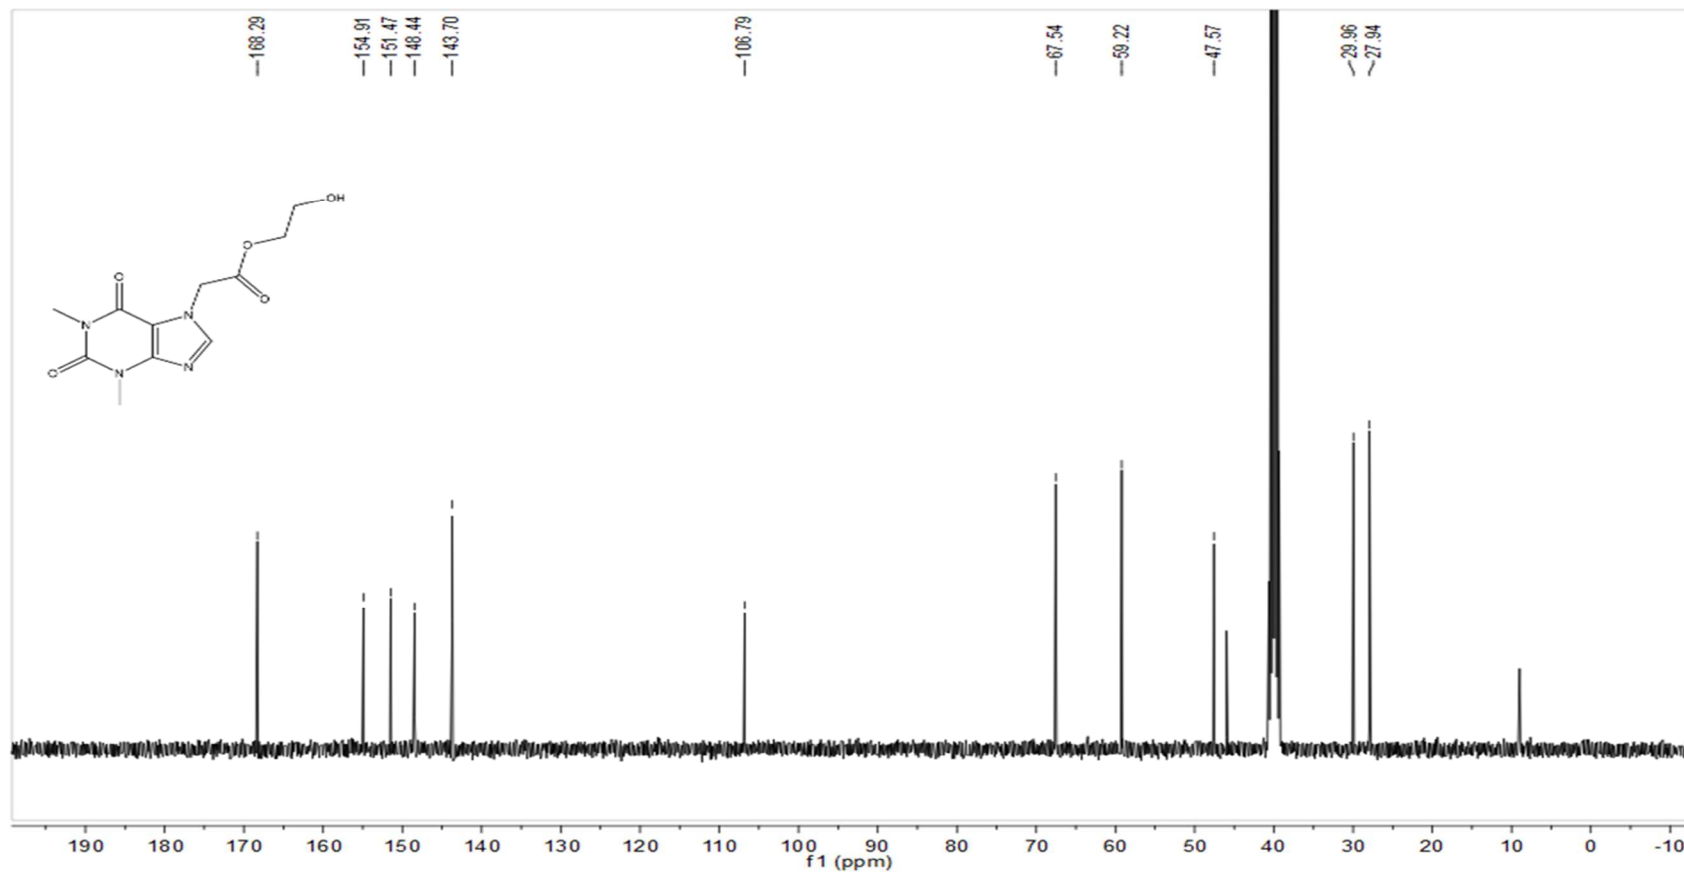

$^{13}\text{C}$  NMR (101 MHz, DMSO)  $\delta$  168.29, 154.91, 151.47, 148.44, 143.70, 106.79, 67.54, 59.22, 47.57, 29.96, 27.94.

SFig. 7. The  $^{13}\text{C}$ -NMR for reference standards. (F) M5.

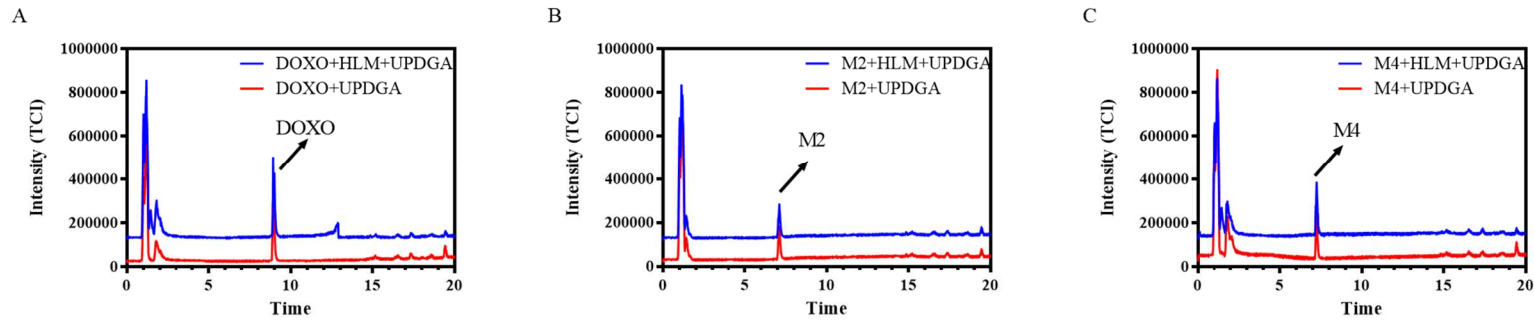

SFig. 8. TIC chromatogram of different substrates in phase II metabolism incubation system in the presences or absence of HLM determined by LC-Triple TOF. (A) DOXO; (B) M2; (C) M4.

**Supplemental Table**

STable 1. The ion transitions monitored for DOXO and metabolites.

| analyte | Q1 Mass (Da) | Q3 Mass (Da) | Dwell (msec) |
|---------|--------------|--------------|--------------|
| DOXO    | 267.1        | 181.1        | 60           |
| M1      | 241.1        | 181.1        | 60           |
| M2      | 239.1        | 181.1        | 60           |
| M4      | 225.1        | 181.1        | 60           |
| M5      | 283.1        | 239.1        | 60           |
| M8      | 253.1        | 167.1        | 60           |
| M9      | 265.1        | 181.1        | 60           |

STable 2. Metabolites of DOXO detected by LC-Triple TOF in HLM.

|    | Rt   |          | Ion                                 | Formula                                                       | Error<br>ppm | Product ions (m/z)                                         |     |     |      |     |      |
|----|------|----------|-------------------------------------|---------------------------------------------------------------|--------------|------------------------------------------------------------|-----|-----|------|-----|------|
|    | min  | Measured |                                     |                                                               |              |                                                            | HLM | MLM | RaLM | RLM | CyLM |
| M0 | 6.68 | 267.1085 | [M+H] <sup>+</sup>                  | C <sub>11</sub> H <sub>14</sub> N <sub>4</sub> O <sub>4</sub> | -1.0         | 223.0814, 210.0867, 181.0712, 166.0602, 138.0654, 124.0494 |     |     |      |     |      |
| M1 | 5.10 | 241.0935 | [M+H <sub>2</sub> O+H] <sup>+</sup> | C <sub>9</sub> H <sub>10</sub> N <sub>4</sub> O <sub>3</sub>  | 1.5          | 223.0828, 195.0875, 181.0720, 166.0611, 138.0660, 124.0499 | +++ | +++ | +++  | +++ | +++  |
| M2 | 4.65 | 239.0772 | [M+H] <sup>+</sup>                  | C <sub>9</sub> H <sub>10</sub> N <sub>4</sub> O <sub>4</sub>  | -1.2         | 221.0653, 181.0708, 138.0640, 124.0495                     | +   | ++  | +    | +   | +    |
| M3 | 4.67 | 181.0714 | [M+H] <sup>+</sup>                  | C <sub>7</sub> H <sub>8</sub> N <sub>4</sub> O <sub>2</sub>   | -3.3         | 124.0502, 139.9619                                         | +   | +   | +    | +   | +    |
| M4 | 5.24 | 225.0969 | [M+H] <sup>+</sup>                  | C <sub>9</sub> H <sub>12</sub> N <sub>4</sub> O <sub>3</sub>  | -5.9         | 207.0872, 181.0713, 124.0490                               | +   | +++ | +++  | +   | ++   |
| M5 | 5.58 | 283.1033 | [M+H] <sup>+</sup>                  | C <sub>11</sub> H <sub>14</sub> N <sub>4</sub> O <sub>5</sub> | -1.4         | 265.0192, 239.0712, 181.0711, 124.0502                     | +   | +++ | ++   | +++ | ++   |
| M6 | 5.84 | 283.1034 | [M+H] <sup>+</sup>                  | C <sub>11</sub> H <sub>14</sub> N <sub>4</sub> O <sub>5</sub> | -1.1         | 267.0142, 239.0779, 197.0662                               | +   | +   | +    | +   | +    |
| M7 | 5.18 | 253.0928 | [M+H] <sup>+</sup>                  | C <sub>10</sub> H <sub>12</sub> N <sub>4</sub> O <sub>4</sub> | -1.3         | 167.0558                                                   | +   | +   | +    | +   | +    |
| M8 | 5.72 | 253.0920 | [M+H] <sup>+</sup>                  | C <sub>10</sub> H <sub>12</sub> N <sub>4</sub> O <sub>4</sub> | -4.9         | 167.0558                                                   | +   | +   | +    | +   | +    |
| M9 | 6.36 | 265.0923 | [M+H] <sup>+</sup>                  | C <sub>11</sub> H <sub>12</sub> N <sub>4</sub> O <sub>4</sub> | -3.1         | 181.0710                                                   | +   | +   | +    | +   | +    |

STable. 3. The HPLC condition for purity test.

---

|                   |                                                                                                              |
|-------------------|--------------------------------------------------------------------------------------------------------------|
| column            | VP-ODS 3.0×100 mm 4.6 μm                                                                                     |
| mobile phase      | A: 0.2% formic acid; B acetonitrile<br>0~2 min: 2%B<br>2~28 min: 2%B~90%B<br>28~30 min: 90%B<br>30.1min: 2%B |
| Flow:             | 0.8 mL/min                                                                                                   |
| Temperature:      | 30°C                                                                                                         |
| Detector:         | UV@273                                                                                                       |
| Injection volume: | 10 μL                                                                                                        |

---

STable. 4. Representative calibration curves for DOXO, M1, M2, M4, and M5.

| analyte | curve                         | $r^2$  |
|---------|-------------------------------|--------|
| DOXO    | $y=4034.84212 x + 117.49016$  | 0.9936 |
| M1      | $y=1260.46153 x + 174.46048$  | 0.9952 |
| M2      | $y=1205.52800 x + 97.24184$   | 0.9969 |
| M4      | $y=2683.56612 x + 654.08111$  | 0.9943 |
| M5      | $y=1803.35266 x + 1165.32597$ | 0.9917 |
